# Supplementary material for: Replication and Characterization of Association between ABO SNPs and Red Blood Cell Traits by Meta-Analysis in Europeans
Source: PLoS One. 2016 Jun 9;11(6):e0156914. doi: 10.1371/journal.pone.0156914 (PMC4900668; doi:10.1371/journal.pone.0156914)
Supplement: S3 Table — All SNPs significantly associated with one or more red blood cell traits (P < 5×10−8) in seven studies from the UCLEB consortium (separate file). (XLSX) [file pone.0156914.s012.xlsx]

## Sheet: ALL significant SNPs 
				Discovery study (NHb=11 093; NHct/MCV=8128; NMCH/MCHC=8125, NRCC=8129)
Index	Marker Name	Position (chr:bp)	Minor Allele*	MAF	Effect	StdErr	P	Direction	HetISq	HetPVal	Trait		* Structural variation alleles: d=deletion,i=insertion, r=reference
1	rs181058325	6:25314597	g	0.064	0.3838	0.0643	2.345e-09	-----	0	0.6156	MCH
2	6:25335967	6:25335967	a	0.101	0.2575	0.0472	4.865e-08	+++++	0	0.5759	MCH
3	rs78839652	6:25344487	a	0.0998	0.2622	0.0475	3.305e-08	+++++	0	0.7085	MCH
4	rs115103534	6:25344680	t	0.0998	0.2622	0.0475	3.307e-08	+++++	0	0.7085	MCH
5	rs115862270	6:25344734	a	0.0998	0.2622	0.0475	3.309e-08	+++++	0	0.7085	MCH
6	rs78280411	6:25345037	g	0.0997	0.2622	0.0475	3.326e-08	-----	0	0.7086	MCH
7	rs79693813	6:25345251	t	0.0997	0.2621	0.0475	3.343e-08	+++++	0	0.7088	MCH
8	rs77436908	6:25345356	a	0.0997	0.2621	0.0475	3.343e-08	+++++	0	0.7088	MCH
9	rs79840009	6:25345558	a	0.0997	0.2621	0.0475	3.343e-08	+++++	0	0.7088	MCH
10	rs142634419	6:25345974	g	0.0997	0.2621	0.0475	3.343e-08	-----	0	0.7088	MCH
11	rs116626667	6:25346414	a	0.1	0.2639	0.0474	2.646e-08	+++++	0	0.6773	MCH
12	rs74412351	6:25347728	c	0.1002	0.2648	0.0474	2.256e-08	-----	0	0.6549	MCH
13	rs79118127	6:25348062	t	0.1001	0.2648	0.0474	2.243e-08	+++++	0	0.6547	MCH
14	rs59821513	6:25348490	c	0.1023	0.2569	0.047	4.596e-08	-----	0	0.4938	MCH
15	rs139436607	6:25348616	c	0.1017	0.2648	0.0474	2.259e-08	-----	0	0.6342	MCH
16	rs76546740	6:25349053	g	0.1001	0.2648	0.0474	2.243e-08	-----	0	0.6547	MCH
17	rs76725563	6:25349257	c	0.1001	0.2648	0.0474	2.243e-08	-----	0	0.6547	MCH
18	rs77482574	6:25349651	a	0.1001	0.2648	0.0474	2.243e-08	+++++	0	0.6547	MCH
19	rs145655407	6:25350157	g	0.1001	0.2648	0.0474	2.243e-08	-----	0	0.6547	MCH
20	rs76537146	6:25350708	a	0.1001	0.2648	0.0474	2.243e-08	+++++	0	0.6547	MCH
21	rs77192487	6:25350760	a	0.1001	0.2648	0.0474	2.243e-08	+++++	0	0.6547	MCH
22	rs115639976	6:25353334	a	0.1001	0.2648	0.0474	2.243e-08	+++++	0	0.6547	MCH
23	rs1883392	6:25354122	t	0.1001	0.2648	0.0474	2.243e-08	+++++	0	0.6547	MCH
24	rs79609187	6:25354424	a	0.1009	0.2611	0.0473	3.272e-08	+++++	0	0.6422	MCH
25	rs75352650	6:25354449	a	0.1001	0.2648	0.0474	2.243e-08	+++++	0	0.6547	MCH
26	rs7748771	6:25355099	g	0.1001	0.2648	0.0474	2.243e-08	-----	0	0.6547	MCH
27	rs7749494	6:25355304	a	0.1001	0.2648	0.0474	2.243e-08	+++++	0	0.6547	MCH
28	6:25357208:G_GGG	6:25357208	i	0.1001	0.2654	0.0474	2.138e-08	+++++	0	0.6528	MCH
29	rs140916016	6:25357564	g	0.1001	0.2654	0.0474	2.138e-08	-----	0	0.6533	MCH
30	rs79441875	6:25357636	t	0.1001	0.2654	0.0474	2.139e-08	+++++	0	0.6539	MCH
31	rs80112394	6:25358611	g	0.1001	0.2656	0.0474	2.113e-08	-----	0	0.6534	MCH
32	rs79225889	6:25363472	g	0.1003	0.2647	0.0474	2.364e-08	-----	0	0.688	MCH
33	rs76300007	6:25363553	g	0.1003	0.2649	0.0474	2.298e-08	-----	0	0.6905	MCH
34	rs78578594	6:25364645	t	0.1	0.2658	0.0474	2.059e-08	+++++	0	0.6779	MCH
35	rs115869907	6:25365901	a	0.1	0.2626	0.0474	3.042e-08	+++++	0	0.5293	MCH
36	rs78536796	6:25370583	a	0.0998	0.2597	0.0475	4.454e-08	+++++	0	0.5285	MCH
37	6:25372632:ATTAT	6:25372632	d	0.1	0.2602	0.0475	4.197e-08	+++++	0	0.5135	MCH
38	rs111722075	6:25374046	t	0.1562	0.2209	0.0393	1.925e-08	+++++	35.3	0.1861	MCH
39	rs115425228	6:25383017	a	0.0998	0.2605	0.0475	4.053e-08	+++++	0	0.5135	MCH
40	rs79222483	6:25384820	g	0.1	0.2724	0.0473	8.701e-09	-----	0	0.538	MCH
41	rs76118339	6:25385969	a	0.0997	0.2721	0.0474	9.367e-09	+++++	0	0.5259	MCH
42	rs79248604	6:25391837	a	0.1027	0.2686	0.0472	1.306e-08	+++++	0	0.6698	MCH
43	rs192533405	6:25392326	a	0.0962	0.2944	0.0489	1.714e-09	+++++	0	0.6531	MCH
44	rs74589007	6:25393235	t	0.1005	0.2708	0.0473	1.023e-08	+++++	0	0.6157	MCH
45	rs17316893	6:25394439	t	0.1005	0.2708	0.0473	1.012e-08	+++++	0	0.6144	MCH
46	rs2149227	6:25397289	c	0.1005	0.271	0.0473	9.862e-09	-----	0	0.6114	MCH
47	rs17251430	6:25398003	g	0.1005	0.2713	0.0473	9.656e-09	-----	0	0.6098	MCH
48	rs985984	6:25402179	g	0.0987	0.2804	0.0477	4.096e-09	-----	0	0.6093	MCH
49	rs115235757	6:25404898	t	0.0985	0.2799	0.0477	4.396e-09	+++++	0	0.5935	MCH
50	rs79794948	6:25406036	c	0.0985	0.2803	0.0477	4.158e-09	-----	0	0.588	MCH
51	rs79665799	6:25408104	g	0.0987	0.2817	0.0477	3.444e-09	-----	0	0.5667	MCH
52	rs72831276	6:25452783	c	0.1193	0.1307	0.0231	1.447e-08	-------	0	0.8967	Hb
53	rs72831276	6:25452783	c	0.12	0.2553	0.0435	4.431e-09	-----	0	0.7693	MCH
54	rs74662487	6:25453057	g	0.1194	0.1312	0.0231	1.274e-08	-------	0	0.915	Hb
55	rs74662487	6:25453057	g	0.1202	0.2554	0.0435	4.305e-09	-----	0	0.7689	MCH
56	rs2274089	6:25488583	t	0.0951	0.2887	0.0481	2.003e-09	+++++	0	0.7315	MCH
57	rs17318575	6:25493238	g	0.0957	0.2886	0.048	1.857e-09	-----	0	0.7457	MCH
58	6:25510696:CAT_C	6:25510696	d	0.1024	0.1395	0.0248	1.904e-08	+++++++	0	0.9514	Hb
59	6:25510696:CAT_C	6:25510696	d	0.1037	0.2889	0.0467	6.121e-10	+++++	0	0.8702	MCH
60	rs55728843	6:25515150	t	0.1029	0.139	0.0247	1.963e-08	+++++++	0	0.9407	Hb
61	rs55728843	6:25515150	t	0.1042	0.2908	0.0466	4.251e-10	+++++	0	0.8738	MCH
62	rs149359690	6:25526319	t	0.1029	0.1553	0.025	4.883e-10	+++++++	0	0.8132	Hb
63	rs149359690	6:25526319	t	0.1048	0.3476	0.0468	1.122e-13	+++++	0	0.8596	MCH
64	rs149359690	6:25526319	t	0.105	0.7746	0.1272	1.147e-09	+++++	0	0.89	MCV
65	rs77244967	6:25536591	c	0.1293	0.1291	0.0225	8.877e-09	-------	0	0.9386	Hb
66	rs77244967	6:25536591	c	0.1314	0.2608	0.0422	6.562e-10	-----	0	0.9517	MCH
67	rs79580305	6:25538447	g	0.1293	0.1292	0.0225	8.846e-09	-------	0	0.9387	Hb
68	rs79580305	6:25538447	g	0.1314	0.2608	0.0422	6.529e-10	-----	0	0.9519	MCH
69	rs115074093	6:25543913	g	0.0951	0.1474	0.0257	9.388e-09	-------	0	0.8584	Hb
70	rs115074093	6:25543913	g	0.0968	0.3362	0.0481	2.85e-12	-----	0	0.8826	MCH
71	rs115074093	6:25543913	g	0.097	0.7745	0.1308	3.19e-09	-----	0	0.9598	MCV
72	rs78975171	6:25554911	t	0.1006	0.1398	0.0249	2.008e-08	+++++++	0	0.9544	Hb
73	rs78975171	6:25554911	t	0.1017	0.304	0.0469	9.344e-11	+++++	0	0.9537	MCH
74	rs75580845	6:25578433	c	0.0877	0.1532	0.0265	7.444e-09	-------	0	0.7656	Hb
75	rs75580845	6:25578433	c	0.0894	0.355	0.0498	9.621e-13	-----	0	0.8802	MCH
76	rs75580845	6:25578433	c	0.0896	0.812	0.1352	1.896e-09	-----	0	0.9467	MCV
77	rs79681349	6:25582712	g	0.0932	0.1511	0.0259	5.509e-09	-------	0	0.8306	Hb
78	rs79681349	6:25582712	g	0.0948	0.3413	0.0486	2.235e-12	-----	0	0.9319	MCH
79	rs79681349	6:25582712	g	0.095	0.7873	0.1321	2.528e-09	-----	0	0.964	MCV
80	rs78341453	6:25584831	g	0.1283	0.1351	0.0225	2.025e-09	-------	0	0.8324	Hb
81	rs78341453	6:25584831	g	0.1303	0.2611	0.0424	7.442e-10	-----	0	0.9102	MCH
82	rs75865451	6:25588285	a	0.1014	0.1426	0.0248	9.511e-09	+++++++	0	0.9051	Hb
83	rs75865451	6:25588285	a	0.1025	0.3011	0.0468	1.285e-10	+++++	0	0.9282	MCH
84	rs17492120	6:25590311	t	0.1271	0.1321	0.0226	5.196e-09	+++++++	0	0.8858	Hb
85	rs17492120	6:25590311	t	0.1291	0.263	0.0425	6.365e-10	+++++	0	0.9513	MCH
86	6:25590833:A_AT	6:25590833	i	0.1275	0.1323	0.0226	4.804e-09	+++++++	0	0.8945	Hb
87	6:25590833:A_AT	6:25590833	i	0.1294	0.262	0.0425	7.278e-10	+++++	0	0.9409	MCH
88	rs75063949	6:25591041	g	0.136	0.1257	0.022	1.084e-08	-------	0	0.8281	Hb
89	rs75063949	6:25591041	g	0.1381	0.2288	0.0414	3.215e-08	-----	0	0.9869	MCH
90	rs77346695	6:25600233	g	0.1286	0.134	0.0225	2.587e-09	-------	0	0.8689	Hb
91	rs77346695	6:25600233	g	0.1306	0.2631	0.0423	5.2e-10	-----	0	0.9024	MCH
92	rs41271823	6:25601089	c	0.1286	0.1339	0.0225	2.681e-09	-------	0	0.8672	Hb
93	rs41271823	6:25601089	c	0.1306	0.2648	0.0424	4.04e-10	-----	0	0.9133	MCH
94	rs7747371	6:25603102	a	0.1018	0.1399	0.0248	1.637e-08	+++++++	0	0.9204	Hb
95	rs7747371	6:25603102	a	0.1029	0.3015	0.0467	1.09e-10	+++++	0	0.9175	MCH
96	rs7747371	6:25603102	a	0.1032	0.6958	0.1269	4.225e-08	+++++	0	0.8967	MCV
97	rs114891703	6:25604193	a	0.1018	0.1399	0.0248	1.637e-08	+++++++	0	0.9204	Hb
98	rs114891703	6:25604193	a	0.1029	0.3015	0.0467	1.09e-10	+++++	0	0.9175	MCH
99	rs114891703	6:25604193	a	0.1032	0.6958	0.1269	4.225e-08	+++++	0	0.8967	MCV
100	rs75080831	6:25611826	g	0.1015	0.1392	0.0248	2.025e-08	-------	0	0.9418	Hb
101	rs75080831	6:25611826	g	0.1027	0.2985	0.0467	1.691e-10	-----	0	0.9044	MCH
102	rs78912080	6:25616453	g	0.0763	0.1769	0.0282	3.627e-10	-------	0	0.4949	Hb
103	rs78912080	6:25616453	g	0.0779	0.4239	0.0528	1.032e-15	-----	0	0.6875	MCH
104	rs78912080	6:25616453	g	0.0782	0.961	0.1435	2.151e-11	-----	0	0.7189	MCV
105	rs3804103	6:25617291	a	0.1014	0.1388	0.0248	2.194e-08	+++++++	0	0.9456	Hb
106	rs3804103	6:25617291	a	0.1027	0.3002	0.0467	1.312e-10	+++++	0	0.8897	MCH
107	rs78151190	6:25619007	c	0.1286	0.1306	0.0225	6.294e-09	-------	0	0.9135	Hb
108	rs78151190	6:25619007	c	0.1306	0.2581	0.0423	1.06e-09	-----	0	0.9513	MCH
109	rs7765813	6:25624395	t	0.0995	0.1382	0.025	3.295e-08	+++++++	0	0.9432	Hb
110	rs7765813	6:25624395	t	0.1007	0.3094	0.0471	4.947e-11	+++++	0	0.946	MCH
111	rs7765813	6:25624395	t	0.1008	0.7015	0.128	4.21e-08	+++++	0	0.9674	MCV
112	rs990850	6:25628511	a	0.0999	0.1365	0.025	4.609e-08	+++++++	0	0.9279	Hb
113	rs990850	6:25628511	a	0.1011	0.3107	0.047	3.86e-11	+++++	0	0.9517	MCH
114	rs990850	6:25628511	a	0.1013	0.7141	0.1278	2.303e-08	+++++	0	0.9695	MCV
115	rs9467545	6:25638464	t	0.1575	0.2219	0.039	1.313e-08	-----	0	0.9755	MCH
116	rs1923027	6:25647354	t	0.1566	0.2176	0.039	2.437e-08	-----	0	0.9296	MCH
117	rs9467550	6:25653401	g	0.1017	0.3187	0.0468	9.47e-12	-----	0	0.9935	MCH
118	rs9467550	6:25653401	g	0.1019	0.7208	0.1271	1.435e-08	-----	0	0.9574	MCV
119	rs56329220	6:25657845	a	0.1015	0.3188	0.0468	1.017e-11	+++++	0	0.993	MCH
120	rs56329220	6:25657845	a	0.1017	0.7209	0.1274	1.519e-08	+++++	0	0.9577	MCV
121	rs72838858	6:25659305	t	0.1263	0.2614	0.0427	9.492e-10	+++++	0	0.908	MCH
122	rs1321247	6:25662873	t	0.0989	0.1398	0.0251	2.449e-08	-------	0	0.9376	Hb
123	rs1321247	6:25662873	t	0.1	0.322	0.0472	8.753e-12	-----	0	0.9603	MCH
124	rs1321247	6:25662873	t	0.1001	0.7277	0.1283	1.405e-08	-----	0	0.9426	MCV
125	rs56246159	6:25668700	c	0.1263	0.2611	0.0427	9.872e-10	-----	0	0.9082	MCH
126	rs56206297	6:25669278	t	0.1578	0.2126	0.039	4.953e-08	+++++	0	0.9447	MCH
127	rs2876691	6:25669525	a	0.1572	0.2168	0.039	2.618e-08	+++++	0	0.9447	MCH
128	rs2328891	6:25669669	a	0.1573	0.2167	0.039	2.644e-08	+++++	0	0.9446	MCH
129	rs72838866	6:25673273	g	0.132	0.2498	0.042	2.601e-09	-----	0	0.5927	MCH
130	rs9366626	6:25684953	a	0.3994	0.1614	0.0295	4.308e-08	+++++	6.7	0.3688	MCH
131	rs2205936	6:25685492	c	0.4043	0.1595	0.0291	4.022e-08	+++++	12.6	0.3336	MCH
132	rs4478398	6:25694684	c	0.218	0.1939	0.0343	1.591e-08	-----	0	0.6914	MCH
133	rs76703022	6:25703529	c	0.2175	0.1908	0.0343	2.696e-08	-----	0	0.6449	MCH
134	rs116009877	6:25715657	a	0.0757	0.2202	0.0298	1.585e-13	+++++++	19.3	0.2825	Hb
135	rs116009877	6:25715657	a	0.0772	0.5048	0.0555	8.965e-20	+++++	1.3	0.3987	MCH
136	rs116009877	6:25715657	a	0.0776	1.1158	0.1509	1.406e-13	+++++	0	0.52	MCV
137	rs9358870	6:25719210	c	0.2183	0.1926	0.0343	2.034e-08	-----	0	0.683	MCH
138	6:25721594:TGACA	6:25721594	d	0.2179	0.1915	0.0344	2.581e-08	+++++	0	0.6723	MCH
139	rs12191655	6:25803095	t	0.2069	0.2027	0.0351	7.341e-09	+++++	9.5	0.3521	MCH
140	rs78833965	6:25804921	a	0.1097	0.1583	0.0241	5.116e-11	+++++++	28.6	0.2102	Hb
141	rs78833965	6:25804921	a	0.1119	0.3734	0.0452	1.47e-16	+++++	0	0.4398	MCH
142	rs78833965	6:25804921	a	0.1124	0.7918	0.1228	1.152e-10	+++++	0	0.6915	MCV
143	rs17342717	6:25821770	t	0.1008	0.1614	0.025	1.137e-10	+++++++	30.8	0.1932	Hb
144	rs17342717	6:25821770	t	0.1031	0.3754	0.0469	1.213e-15	+++++	11.1	0.3424	MCH
145	rs17342717	6:25821770	t	0.1037	0.8058	0.1274	2.532e-10	+++++	0	0.5654	MCV
146	rs80176492	6:25828106	a	0.0999	0.1654	0.0251	4.579e-11	+++++++	29.8	0.2005	Hb
147	rs80176492	6:25828106	a	0.1022	0.3765	0.0471	1.271e-15	+++++	8.4	0.3584	MCH
148	rs80176492	6:25828106	a	0.1028	0.8123	0.1279	2.107e-10	+++++	0	0.6756	MCV
149	rs1408272	6:25842951	g	0.0759	0.2045	0.0283	5.177e-13	-------	31	0.1914	Hb
150	rs1408272	6:25842951	g	0.0776	0.4715	0.053	5.43e-19	-----	0	0.5339	MCH
151	rs1408272	6:25842951	g	0.0781	1.0762	0.1438	7.228e-14	-----	0	0.624	MCV
152	rs79920061	6:25857920	a	0.0766	0.2052	0.0283	3.982e-13	+++++++	30.3	0.1967	Hb
153	rs79920061	6:25857920	a	0.0782	0.4657	0.0529	1.286e-18	+++++	0	0.651	MCH
154	rs79920061	6:25857920	a	0.0787	1.0626	0.1436	1.369e-13	+++++	0	0.6309	MCV
155	rs78273613	6:25866075	g	0.0999	0.17	0.0251	1.378e-11	-------	31.8	0.1856	Hb
156	rs78273613	6:25866075	g	0.1023	0.3825	0.0471	4.772e-16	-----	1.5	0.3977	MCH
157	rs78273613	6:25866075	g	0.1028	0.8347	0.128	7.017e-11	-----	0	0.7144	MCV
158	rs55925606	6:25878848	g	0.0733	0.2128	0.0288	1.52e-13	-------	20.4	0.2743	Hb
159	rs55925606	6:25878848	g	0.075	0.4899	0.0538	8.979e-20	-----	0	0.5888	MCH
160	rs55925606	6:25878848	g	0.0755	1.0993	0.1462	5.616e-14	-----	0	0.5786	MCV
161	rs80215559	6:25918225	c	0.073	0.2154	0.0289	8.903e-14	-------	8.5	0.3637	Hb
162	rs80215559	6:25918225	c	0.0747	0.5124	0.054	2.416e-21	-----	0	0.4505	MCH
163	rs80215559	6:25918225	c	0.0752	1.1668	0.1467	1.852e-15	-----	0	0.5945	MCV
164	6:25921812:TTAG_	6:25921812	d	0.3826	0.1681	0.0295	1.251e-08	+++++	0	0.6546	MCH
165	6:25921812:TTAG_	6:25921812	d	0.3828	0.4407	0.0803	4.075e-08	+++++	0	0.7179	MCV
166	rs169219	6:25957392	c	0.4031	-0.0868	0.0153	1.318e-08	++++-++	6.4	0.3791	Hb
167	rs12210098	6:25963966	t	0.341	0.0879	0.016	3.888e-08	++++-++	54.9	0.03848	Hb
168	rs12210098	6:25963966	t	0.3408	0.1951	0.0301	9.386e-11	+++++	0	0.4997	MCH
169	rs12210098	6:25963966	t	0.3409	0.4832	0.0819	3.636e-09	+++++	0	0.7127	MCV
170	rs1436310	6:25969958	c	0.4347	0.0918	0.0152	1.699e-09	+++++++	13.5	0.3265	Hb
171	rs1436310	6:25969958	c	0.4353	0.1724	0.0287	1.776e-09	+++++	0	0.8293	MCH
172	rs1436310	6:25969958	c	0.4355	0.4509	0.078	7.41e-09	+++++	0	0.6397	MCV
173	rs1436309	6:25970109	a	0.4308	0.0924	0.0153	1.398e-09	+++++++	25	0.238	Hb
174	rs1436309	6:25970109	a	0.4311	0.1817	0.0287	2.308e-10	+++++	0	0.8086	MCH
175	rs1436309	6:25970109	a	0.4314	0.471	0.078	1.565e-09	+++++	0	0.679	MCV
176	rs72832602	6:25978402	c	0.1284	0.2883	0.0426	1.327e-11	-----	0	0.6785	MCH
177	rs72832602	6:25978402	c	0.1282	0.6493	0.1161	2.251e-08	-----	0	0.6582	MCV
178	rs9379814	6:25979869	t	0.432	0.0906	0.0153	2.911e-09	+++++++	3.4	0.4002	Hb
179	rs9379814	6:25979869	t	0.4324	0.1803	0.0287	3.289e-10	+++++	0	0.846	MCH
180	rs9379814	6:25979869	t	0.4326	0.4612	0.0781	3.484e-09	+++++	0	0.7387	MCV
181	rs9379815	6:25980116	a	0.4312	0.0914	0.0153	2.11e-09	+++++++	6.6	0.3776	Hb
182	rs9379815	6:25980116	a	0.4314	0.1819	0.0287	2.306e-10	+++++	0	0.8105	MCH
183	rs9379815	6:25980116	a	0.4316	0.4674	0.0781	2.153e-09	+++++	0	0.745	MCV
184	rs1130000	6:25985396	g	0.4272	0.0892	0.0153	5.466e-09	-------	0	0.5546	Hb
185	rs1130000	6:25985396	g	0.4279	0.1799	0.0288	3.963e-10	-----	0	0.8466	MCH
186	rs1130000	6:25985396	g	0.4281	0.4588	0.0782	4.536e-09	-----	0	0.6663	MCV
187	6:25987435:C_CA	6:25987435	i	0.3643	0.1033	0.0159	7.324e-11	++++-++	21.9	0.2623	Hb
188	6:25987435:C_CA	6:25987435	i	0.3653	0.2206	0.0298	1.409e-13	+++++	0	0.9885	MCH
189	6:25987435:C_CA	6:25987435	i	0.3654	0.5309	0.0812	6.183e-11	+++++	0	0.8884	MCV
190	6:25987438:CCCG_	6:25987438	r	0.4801	-0.097	0.0162	2.121e-09	++++-++	27.3	0.2201	Hb
191	6:25987438:CCCG_	6:25987438	r	0.4809	-0.1849	0.0305	1.359e-09	+++++	0	0.9065	MCH
192	6:25987439:CCG_C	6:25987438	r	0.4397	-0.1842	0.0313	4.133e-09	+++++	0	0.8328	MCH
193	rs7766267	6:25990474	c	0.1286	0.2873	0.0426	1.49e-11	+++++	0	0.664	MCH
194	rs7766267	6:25990474	c	0.1284	0.6505	0.116	2.051e-08	+++++	0	0.6337	MCV
195	rs7766342	6:25990674	a	0.4271	0.0891	0.0153	5.606e-09	+++++++	0	0.5642	Hb
196	rs7766342	6:25990674	a	0.4278	0.1796	0.0287	4.122e-10	+++++	0	0.843	MCH
197	rs7766342	6:25990674	a	0.4281	0.4574	0.0782	4.939e-09	+++++	0	0.6396	MCV
198	rs7752351	6:25990842	c	0.1286	0.2874	0.0426	1.471e-11	-----	0	0.6646	MCH
199	rs7752351	6:25990842	c	0.1284	0.6508	0.116	2.021e-08	-----	0	0.6345	MCV
200	rs9461229	6:25992279	t	0.4274	0.0896	0.0153	4.618e-09	+++++++	0	0.586	Hb
201	rs9461229	6:25992279	t	0.4281	0.179	0.0287	4.648e-10	+++++	0	0.8413	MCH
202	rs9461229	6:25992279	t	0.4283	0.4549	0.0782	5.973e-09	+++++	0	0.647	MCV
203	rs2032450	6:25993114	g	0.4269	0.0887	0.0153	6.439e-09	-------	0	0.5731	Hb
204	rs2032450	6:25993114	g	0.4276	0.1802	0.0287	3.626e-10	-----	0	0.8324	MCH
205	rs2032450	6:25993114	g	0.4278	0.4588	0.0782	4.432e-09	-----	0	0.6347	MCV
206	rs9467656	6:25993559	a	0.4316	0.0899	0.0153	3.762e-09	+++++++	0.8	0.4175	Hb
207	rs9467656	6:25993559	a	0.4321	0.1796	0.0287	3.805e-10	+++++	0	0.8422	MCH
208	rs9467656	6:25993559	a	0.4323	0.4602	0.078	3.707e-09	+++++	0	0.7042	MCV
209	rs2013063	6:25994098	t	0.4269	0.0887	0.0153	6.442e-09	+++++++	0	0.573	Hb
210	rs2013063	6:25994098	t	0.4276	0.1801	0.0287	3.683e-10	+++++	0	0.8304	MCH
211	rs2013063	6:25994098	t	0.4278	0.4585	0.0782	4.553e-09	+++++	0	0.632	MCV
212	rs6928951	6:25995554	t	0.4267	0.0886	0.0153	6.962e-09	+++++++	0	0.5853	Hb
213	rs6928951	6:25995554	t	0.4275	0.1802	0.0287	3.631e-10	+++++	0	0.8308	MCH
214	rs6928951	6:25995554	t	0.4277	0.4575	0.0782	4.937e-09	+++++	0	0.6245	MCV
215	rs12216125	6:25997458	t	0.358	0.1035	0.0158	5.272e-11	+++++++	20.2	0.2756	Hb
216	rs12216125	6:25997458	t	0.3591	0.2189	0.0297	1.64e-13	+++++	0	0.9827	MCH
217	rs12216125	6:25997458	t	0.3592	0.5201	0.0808	1.213e-10	+++++	0	0.8793	MCV
218	rs9348704	6:26000393	c	0.4333	0.0878	0.0153	9.814e-09	-------	0	0.4525	Hb
219	rs9348704	6:26000393	c	0.4344	0.1788	0.0288	5.106e-10	-----	0	0.8559	MCH
220	rs9348704	6:26000393	c	0.4345	0.4529	0.0783	7.209e-09	-----	0	0.6598	MCV
221	rs72834621	6:26005023	t	0.1238	0.3082	0.0433	1.141e-12	-----	0	0.6549	MCH
222	rs72834621	6:26005023	t	0.1235	0.7017	0.1181	2.837e-09	-----	0	0.514	MCV
223	rs9393681	6:26008260	c	0.4267	0.0878	0.0153	9.757e-09	-------	0	0.4529	Hb
224	rs9393681	6:26008260	c	0.4271	0.1846	0.0287	1.331e-10	-----	0	0.8787	MCH
225	rs9393681	6:26008260	c	0.4272	0.4758	0.0782	1.18e-09	-----	0	0.6701	MCV
226	rs9356996	6:26008487	c	0.4201	-0.1631	0.0286	1.144e-08	+++++	0	0.9484	MCH
227	rs9467658	6:26010881	g	0.4279	0.0876	0.0153	1.046e-08	-------	2.4	0.4071	Hb
228	rs9467658	6:26010881	g	0.4284	0.188	0.0287	6.086e-11	-----	0	0.8949	MCH
229	rs9467658	6:26010881	g	0.4285	0.4898	0.0782	3.803e-10	-----	0	0.6779	MCV
230	rs9461230	6:26019240	c	0.4179	0.0859	0.0154	2.38e-08	+++++++	14.2	0.3214	Hb
231	rs9461230	6:26019240	c	0.4187	0.1864	0.0288	1.038e-10	+++++	0	0.8281	MCH
232	rs9461230	6:26019240	c	0.4188	0.4943	0.0785	3.017e-10	+++++	0	0.6354	MCV
233	rs72834627	6:26019411	c	0.1249	0.3204	0.0431	1.013e-13	+++++	0	0.6875	MCH
234	rs72834627	6:26019411	c	0.1247	0.7339	0.1174	4.057e-10	+++++	0	0.5565	MCV
235	rs2157050	6:26020431	t	0.4142	0.1863	0.0289	1.175e-10	+++++	0	0.7886	MCH
236	rs2157050	6:26020431	t	0.4143	0.4909	0.0787	4.424e-10	+++++	0	0.5269	MCV
237	rs9467662	6:26021327	a	0.4141	0.1857	0.0289	1.37e-10	+++++	0	0.7948	MCH
238	rs9467662	6:26021327	a	0.4143	0.4912	0.0787	4.363e-10	+++++	0	0.5305	MCV
239	rs9467663	6:26021456	g	0.4141	0.1856	0.0289	1.397e-10	-----	0	0.7953	MCH
240	rs9467663	6:26021456	g	0.4142	0.4911	0.0787	4.392e-10	-----	0	0.531	MCV
241	rs72834629	6:26023032	t	0.3454	0.0985	0.0159	6.535e-10	+++++++	13.3	0.3281	Hb
242	rs72834629	6:26023032	t	0.3468	0.2274	0.0299	3.041e-14	+++++	0	0.958	MCH
243	rs72834629	6:26023032	t	0.3467	0.5565	0.0815	8.455e-12	+++++	0	0.8353	MCV
244	rs9379818	6:26023206	t	0.4135	0.0847	0.0154	3.823e-08	+++++++	23.2	0.2518	Hb
245	rs9379818	6:26023206	t	0.4147	0.1799	0.0289	4.763e-10	+++++	0	0.846	MCH
246	rs9379818	6:26023206	t	0.4148	0.4777	0.0786	1.238e-09	+++++	0	0.6362	MCV
247	6:26024877:GA_G	6:26024877	d	0.4134	0.0846	0.0154	3.924e-08	+++++++	23.5	0.2502	Hb
248	6:26024877:GA_G	6:26024877	d	0.4146	0.1799	0.0289	4.838e-10	+++++	0	0.8479	MCH
249	6:26024877:GA_G	6:26024877	d	0.4147	0.4777	0.0787	1.253e-09	+++++	0	0.6427	MCV
250	rs72834630	6:26025186	t	0.1248	0.3194	0.0432	1.351e-13	+++++	0	0.6548	MCH
251	rs72834630	6:26025186	t	0.1246	0.7358	0.1176	3.994e-10	+++++	0	0.5368	MCV
252	rs2032449	6:26026599	c	0.4102	0.1801	0.029	4.981e-10	+++++	0	0.799	MCH
253	rs2032449	6:26026599	c	0.4103	0.4744	0.0788	1.762e-09	+++++	0	0.5575	MCV
254	rs3752420	6:26027135	a	0.4099	0.1799	0.029	5.267e-10	+++++	0	0.7845	MCH
255	rs3752420	6:26027135	a	0.4101	0.4731	0.0788	1.965e-09	+++++	0	0.563	MCV
256	rs3752419	6:26027433	a	0.41	0.1802	0.029	4.938e-10	+++++	0	0.7854	MCH
257	rs3752419	6:26027433	a	0.4102	0.4747	0.0788	1.73e-09	+++++	0	0.5731	MCV
258	rs7753253	6:26030710	g	0.414	0.0875	0.0154	1.339e-08	-------	25	0.2383	Hb
259	rs7753253	6:26030710	g	0.415	0.1835	0.0289	2.185e-10	-----	0	0.8403	MCH
260	rs7753253	6:26030710	g	0.4151	0.4865	0.0787	6.241e-10	-----	0	0.642	MCV
261	rs112370520	6:26036092	t	0.1253	0.3223	0.043	6.962e-14	+++++	0	0.6533	MCH
262	rs112370520	6:26036092	t	0.1251	0.7385	0.1173	3.096e-10	+++++	0	0.5059	MCV
263	rs72834643	6:26041986	t	0.1261	0.3218	0.0429	6.507e-14	+++++	0	0.7227	MCH
264	rs72834643	6:26041986	t	0.1259	0.7439	0.117	2.013e-10	+++++	0	0.5897	MCV
265	rs6938083	6:26042710	t	0.4135	0.0852	0.0154	3.112e-08	+++++++	24.8	0.2398	Hb
266	rs6938083	6:26042710	t	0.4146	0.181	0.0289	3.755e-10	+++++	0	0.8476	MCH
267	rs6938083	6:26042710	t	0.4147	0.4789	0.0786	1.13e-09	+++++	0	0.651	MCV
268	rs72834647	6:26043393	t	0.1261	0.3217	0.0429	6.513e-14	+++++	0	0.7227	MCH
269	rs72834647	6:26043393	t	0.1259	0.7439	0.117	2.006e-10	+++++	0	0.5898	MCV
270	rs2032446	6:26044729	c	0.4136	0.0852	0.0154	3.111e-08	-------	24.8	0.2398	Hb
271	rs2032446	6:26044729	c	0.4146	0.1808	0.0289	3.882e-10	-----	0	0.85	MCH
272	rs2032446	6:26044729	c	0.4148	0.4787	0.0786	1.148e-09	-----	0	0.651	MCV
273	rs2032445	6:26044812	a	0.4089	0.0842	0.0154	4.88e-08	+++++++	9.7	0.3549	Hb
274	rs2032445	6:26044812	a	0.4102	0.1808	0.029	4.302e-10	+++++	0	0.8019	MCH
275	rs2032445	6:26044812	a	0.4104	0.4738	0.0788	1.864e-09	+++++	0	0.556	MCV
276	rs2032444	6:26046744	g	0.3466	0.0995	0.0159	4.258e-10	-------	8	0.3671	Hb
277	rs2032444	6:26046744	g	0.3478	0.2285	0.0299	2.131e-14	-----	0	0.946	MCH
278	rs2032444	6:26046744	g	0.3478	0.5612	0.0814	5.386e-12	-----	0	0.8485	MCV
279	rs2032443	6:26046802	g	0.41	0.1811	0.029	4.043e-10	-----	0	0.7968	MCH
280	rs2032443	6:26046802	g	0.4102	0.4755	0.0788	1.626e-09	-----	0	0.5699	MCV
281	rs10807006	6:26048752	a	0.4099	0.1806	0.029	4.525e-10	+++++	0	0.7957	MCH
282	rs10807006	6:26048752	a	0.4101	0.4756	0.0789	1.627e-09	+++++	0	0.5702	MCV
283	rs10807007	6:26048931	c	0.4135	0.0851	0.0154	3.27e-08	-------	24.8	0.24	Hb
284	rs10807007	6:26048931	c	0.4145	0.1809	0.0289	3.868e-10	-----	0	0.846	MCH
285	rs10807007	6:26048931	c	0.4147	0.4788	0.0786	1.142e-09	-----	0	0.6491	MCV
286	rs7772312	6:26049616	c	0.41	0.1811	0.029	4.043e-10	+++++	0	0.7968	MCH
287	rs7772312	6:26049616	c	0.4102	0.4755	0.0788	1.626e-09	+++++	0	0.5699	MCV
288	rs9379819	6:26049819	c	0.4136	0.0853	0.0154	2.999e-08	-------	24.8	0.2398	Hb
289	rs9379819	6:26049819	c	0.4146	0.1813	0.0289	3.454e-10	-----	0	0.8447	MCH
290	rs9379819	6:26049819	c	0.4147	0.4788	0.0786	1.141e-09	-----	0	0.6488	MCV
291	rs9379820	6:26049924	c	0.41	0.1811	0.029	4.043e-10	-----	0	0.7968	MCH
292	rs9379820	6:26049924	c	0.4102	0.4755	0.0788	1.626e-09	-----	0	0.5699	MCV
293	rs6928717	6:26053264	g	0.414	0.085	0.0154	3.462e-08	-------	25.3	0.236	Hb
294	rs6928717	6:26053264	g	0.4151	0.1811	0.0289	3.715e-10	-----	0	0.846	MCH
295	rs6928717	6:26053264	g	0.4153	0.478	0.0787	1.221e-09	-----	0	0.6478	MCV
296	rs9379821	6:26054268	c	0.41	0.1811	0.029	4.043e-10	-----	0	0.7968	MCH
297	rs9379821	6:26054268	c	0.4102	0.4755	0.0788	1.626e-09	-----	0	0.5699	MCV
298	rs9358902	6:26058570	g	0.4102	0.1828	0.029	2.739e-10	-----	0	0.7963	MCH
299	rs9358902	6:26058570	g	0.4104	0.4772	0.0788	1.415e-09	-----	0	0.5621	MCV
300	rs9358903	6:26061949	c	0.4134	0.0848	0.0154	3.655e-08	-------	27.3	0.2198	Hb
301	rs9358903	6:26061949	c	0.4145	0.1813	0.0289	3.53e-10	-----	0	0.8436	MCH
302	rs9358903	6:26061949	c	0.4147	0.479	0.0787	1.127e-09	-----	0	0.6569	MCV
303	rs9348706	6:26065481	c	0.4102	0.1819	0.029	3.41e-10	+++++	0	0.7935	MCH
304	rs9348706	6:26065481	c	0.4104	0.477	0.0788	1.448e-09	+++++	0	0.5386	MCV
305	rs9393683	6:26066198	g	0.4135	0.0849	0.0154	3.574e-08	-------	26.5	0.2262	Hb
306	rs9393683	6:26066198	g	0.4145	0.181	0.0289	3.791e-10	-----	0	0.8449	MCH
307	rs9393683	6:26066198	g	0.4147	0.4799	0.0787	1.046e-09	-----	0	0.6453	MCV
308	rs9358904	6:26068566	a	0.4088	0.0842	0.0154	4.866e-08	+++++++	14.1	0.3219	Hb
309	rs9358904	6:26068566	a	0.4101	0.1816	0.029	3.603e-10	+++++	0	0.8012	MCH
310	rs9358904	6:26068566	a	0.4103	0.4754	0.0789	1.653e-09	+++++	0	0.5508	MCV
311	rs9295684	6:26069669	c	0.4133	0.0852	0.0154	3.192e-08	-------	27.6	0.2179	Hb
312	rs9295684	6:26069669	c	0.4144	0.1807	0.0289	4.005e-10	-----	0	0.8513	MCH
313	rs9295684	6:26069669	c	0.4145	0.4783	0.0787	1.195e-09	-----	0	0.6573	MCV
314	6:26071027:T_TCA	6:26071027	i	0.4066	0.1802	0.0291	5.848e-10	+++++	0	0.7707	MCH
315	6:26071027:T_TCA	6:26071027	i	0.4067	0.4747	0.0792	2.014e-09	+++++	0	0.5541	MCV
316	rs2051544	6:26071093	t	0.4088	0.0842	0.0154	4.908e-08	+++++++	14.2	0.3218	Hb
317	rs2051544	6:26071093	t	0.4101	0.1816	0.029	3.61e-10	+++++	0	0.8011	MCH
318	rs2051544	6:26071093	t	0.4103	0.4754	0.0789	1.646e-09	+++++	0	0.5513	MCV
319	rs9295685	6:26071725	c	0.4087	0.0844	0.0154	4.519e-08	+++++++	15.5	0.3119	Hb
320	rs9295685	6:26071725	c	0.4101	0.1816	0.029	3.603e-10	+++++	0	0.8012	MCH
321	rs9295685	6:26071725	c	0.4103	0.4754	0.0789	1.653e-09	+++++	0	0.5508	MCV
322	rs9968910	6:26072095	c	0.3579	0.0982	0.0159	6.112e-10	-------	0	0.4513	Hb
323	rs9968910	6:26072095	c	0.3588	0.2276	0.0298	2.147e-14	-----	0	0.7484	MCH
324	rs9968910	6:26072095	c	0.359	0.5623	0.0811	4.127e-12	-----	0	0.6879	MCV
325	rs9366634	6:26072396	g	0.4087	0.0844	0.0154	4.519e-08	-------	15.5	0.3119	Hb
326	rs9366634	6:26072396	g	0.4101	0.1816	0.029	3.603e-10	-----	0	0.8012	MCH
327	rs9366634	6:26072396	g	0.4103	0.4754	0.0789	1.653e-09	-----	0	0.5508	MCV
328	rs6942196	6:26072804	g	0.4097	0.0843	0.0155	4.853e-08	-------	18.5	0.2886	Hb
329	rs6942196	6:26072804	g	0.411	0.1804	0.029	4.997e-10	-----	0	0.7489	MCH
330	rs6942196	6:26072804	g	0.4112	0.4709	0.079	2.465e-09	-----	0	0.5131	MCV
331	rs144861591	6:26072992	t	0.0768	0.2018	0.0283	1.054e-12	+++++++	16.2	0.3063	Hb
332	rs144861591	6:26072992	t	0.0777	0.4747	0.0532	4.312e-19	+++++	0	0.5128	MCH
333	rs144861591	6:26072992	t	0.078	1.0992	0.1445	2.83e-14	+++++	0	0.5011	MCV
334	rs7738854	6:26073295	t	0.4089	0.0845	0.0154	4.429e-08	+++++++	15.7	0.3098	Hb
335	rs7738854	6:26073295	t	0.4103	0.1819	0.029	3.469e-10	+++++	0	0.8024	MCH
336	rs7738854	6:26073295	t	0.4104	0.476	0.0789	1.592e-09	+++++	0	0.5482	MCV
337	rs1539183	6:26075051	c	0.4117	0.1835	0.029	2.373e-10	+++++	0	0.8168	MCH
338	rs1539183	6:26075051	c	0.4119	0.4825	0.0788	9.377e-10	+++++	0	0.48	MCV
339	rs9393684	6:26075531	c	0.4146	0.0845	0.0154	4.173e-08	+++++++	26.7	0.225	Hb
340	rs9393684	6:26075531	c	0.416	0.1827	0.0289	2.602e-10	+++++	0	0.8798	MCH
341	rs9393684	6:26075531	c	0.4162	0.4858	0.0787	6.627e-10	+++++	0	0.5893	MCV
342	rs9358905	6:26077839	a	0.4146	0.0844	0.0154	4.306e-08	+++++++	26.7	0.2248	Hb
343	rs9358905	6:26077839	a	0.416	0.1828	0.0289	2.562e-10	+++++	0	0.879	MCH
344	rs9358905	6:26077839	a	0.4162	0.4862	0.0787	6.45e-10	+++++	0	0.5923	MCV
345	rs9379823	6:26077947	g	0.4117	0.1837	0.029	2.302e-10	-----	0	0.8167	MCH
346	rs9379823	6:26077947	g	0.4119	0.4832	0.0789	8.948e-10	-----	0	0.4856	MCV
347	rs9366636	6:26078232	g	0.4117	0.1837	0.029	2.299e-10	-----	0	0.8166	MCH
348	rs9366636	6:26078232	g	0.4119	0.4832	0.0789	8.919e-10	-----	0	0.486	MCV
349	rs9356998	6:26078544	g	0.4117	0.1837	0.029	2.306e-10	-----	0	0.8162	MCH
350	rs9356998	6:26078544	g	0.4119	0.4832	0.0789	8.924e-10	-----	0	0.4859	MCV
351	rs10946807	6:26079638	c	0.357	0.095	0.0158	1.887e-09	-------	0	0.5596	Hb
352	rs10946807	6:26079638	c	0.3582	0.226	0.0297	2.7e-14	-----	0	0.8215	MCH
353	rs10946807	6:26079638	c	0.3584	0.565	0.0808	2.749e-12	-----	0	0.6693	MCV
354	rs2876694	6:26080750	t	0.4117	0.1837	0.029	2.269e-10	+++++	0	0.8155	MCH
355	rs2876694	6:26080750	t	0.4119	0.4835	0.0789	8.698e-10	+++++	0	0.489	MCV
356	rs2328905	6:26081582	t	0.4146	0.1775	0.029	8.894e-10	+++++	0	0.8992	MCH
357	rs2328905	6:26081582	t	0.4147	0.4637	0.0789	4.088e-09	+++++	0	0.5685	MCV
358	rs9295686	6:26081983	c	0.4116	0.1835	0.029	2.395e-10	+++++	0	0.8151	MCH
359	rs9295686	6:26081983	c	0.4118	0.4821	0.0789	9.81e-10	+++++	0	0.4755	MCV
360	6:26082215:GC_G	6:26082215	d	0.1272	0.3241	0.0427	3.144e-14	+++++	0	0.7093	MCH
361	6:26082215:GC_G	6:26082215	d	0.127	0.762	0.1163	5.731e-11	+++++	0	0.5473	MCV
362	rs111663960	6:26082220	g	0.1271	0.3237	0.0427	3.411e-14	-----	0	0.7062	MCH
363	rs111663960	6:26082220	g	0.1269	0.7614	0.1164	6.023e-11	-----	0	0.5459	MCV
364	rs9295687	6:26082710	c	0.4117	0.1836	0.029	2.334e-10	-----	0	0.8156	MCH
365	rs9295687	6:26082710	c	0.4119	0.4829	0.0789	9.1e-10	-----	0	0.4837	MCV
366	rs4529296	6:26083135	g	0.4116	0.1835	0.029	2.395e-10	-----	0	0.8151	MCH
367	rs4529296	6:26083135	g	0.4118	0.4821	0.0789	9.81e-10	-----	0	0.4755	MCV
368	rs9379825	6:26083871	a	0.4113	0.1823	0.029	3.164e-10	+++++	0	0.8113	MCH
369	rs9379825	6:26083871	a	0.4115	0.4819	0.0789	1.001e-09	+++++	0	0.4992	MCV
370	rs9467672	6:26083904	t	0.4113	0.1823	0.029	3.164e-10	+++++	0	0.8113	MCH
371	rs9467672	6:26083904	t	0.4115	0.4819	0.0789	1.001e-09	+++++	0	0.4992	MCV
372	rs9295688	6:26084217	a	0.4114	0.1826	0.029	2.974e-10	+++++	0	0.8122	MCH
373	rs9295688	6:26084217	a	0.4116	0.4819	0.0789	1.009e-09	+++++	0	0.498	MCV
374	rs1971509	6:26085777	c	0.4116	0.1834	0.029	2.485e-10	-----	0	0.815	MCH
375	rs1971509	6:26085777	c	0.4118	0.4828	0.0789	9.291e-10	-----	0	0.4888	MCV
376	rs2006736	6:26086017	t	0.4117	0.1836	0.029	2.328e-10	+++++	0	0.8156	MCH
377	rs2006736	6:26086017	t	0.4119	0.483	0.0789	9.033e-10	+++++	0	0.4845	MCV
378	rs1800702	6:26086463	g	0.4118	0.1832	0.029	2.514e-10	-----	0	0.8066	MCH
379	rs1800702	6:26086463	g	0.4119	0.4814	0.0788	1.016e-09	-----	0	0.4784	MCV
380	rs1061482	6:26086699	t	0.4117	0.1832	0.029	2.524e-10	+++++	0	0.8061	MCH
381	rs1061482	6:26086699	t	0.4119	0.4814	0.0788	1.015e-09	+++++	0	0.4784	MCV
382	rs2794720	6:26087202	c	0.4117	0.1832	0.029	2.524e-10	+++++	0	0.8061	MCH
383	rs2794720	6:26087202	c	0.4119	0.4814	0.0788	1.015e-09	+++++	0	0.4784	MCV
384	rs2858993	6:26087856	a	0.4118	0.1831	0.029	2.556e-10	+++++	0	0.8029	MCH
385	rs2858993	6:26087856	a	0.412	0.4807	0.0788	1.065e-09	+++++	0	0.4724	MCV
386	rs2794719	6:26088890	g	0.4102	0.0842	0.0154	4.839e-08	-------	11.1	0.3445	Hb
387	rs2794719	6:26088890	g	0.4116	0.1856	0.029	1.488e-10	-----	0	0.8529	MCH
388	rs2794719	6:26088890	g	0.4118	0.488	0.0789	6.083e-10	-----	0	0.4759	MCV
389	rs1799945	6:26091179	g	0.1545	0.3172	0.039	4.042e-16	-----	0	0.6578	MCH
390	rs1799945	6:26091179	g	0.1545	0.7372	0.1062	3.841e-12	-----	0	0.5338	MCV
391	rs2032451	6:26092170	t	0.1558	0.3192	0.0388	2.009e-16	+++++	0	0.6581	MCH
392	rs2032451	6:26092170	t	0.1558	0.7429	0.1058	2.16e-12	+++++	0	0.5587	MCV
393	rs1800562	6:26093141	a	0.0741	0.2093	0.0288	3.442e-13	+++++++	22	0.2617	Hb
394	rs1800562	6:26093141	a	0.0753	0.5051	0.054	8.085e-21	+++++	0	0.4403	MCH
395	rs1800562	6:26093141	a	0.0758	1.1344	0.1467	1.032e-14	+++++	0	0.4876	MCV
396	rs79220007	6:26098474	c	0.0737	0.21	0.0289	3.397e-13	-------	10.9	0.3462	Hb
397	rs79220007	6:26098474	c	0.0747	0.5122	0.0541	2.877e-21	-----	0	0.4158	MCH
398	rs79220007	6:26098474	c	0.0752	1.1601	0.147	2.965e-15	-----	0	0.4995	MCV
399	rs198851	6:26104632	t	0.1544	0.3198	0.039	2.373e-16	+++++	0	0.6431	MCH
400	rs198851	6:26104632	t	0.1544	0.7439	0.1062	2.504e-12	+++++	0	0.5417	MCV
401	rs198846	6:26107463	a	0.1599	0.2972	0.0385	1.08e-14	+++++	0	0.691	MCH
402	rs198846	6:26107463	a	0.1599	0.693	0.1048	3.694e-11	+++++	0	0.6373	MCV
403	rs198833	6:26114508	g	0.1598	0.2943	0.0385	2.001e-14	-----	0	0.7084	MCH
404	rs198833	6:26114508	g	0.1598	0.6862	0.1048	5.795e-11	-----	0	0.6402	MCV
405	6:26118437:CA_C	6:26118437	r	0.1628	0.2869	0.0386	1.033e-13	-----	0	0.62	MCH
406	6:26118437:CA_C	6:26118437	r	0.1628	0.6737	0.1051	1.453e-10	-----	0	0.551	MCV
407	6:26118537:CTCAA	6:26118537	r	0.1538	0.3103	0.0391	2.021e-15	-----	0	0.684	MCH
408	6:26118537:CTCAA	6:26118537	r	0.1538	0.7267	0.1065	8.708e-12	-----	0	0.6154	MCV
409	rs115740542	6:26123502	c	0.0728	0.2139	0.029	1.595e-13	-------	0	0.4845	Hb
410	rs115740542	6:26123502	c	0.0737	0.5095	0.0545	8.268e-21	-----	0	0.4499	MCH
411	rs115740542	6:26123502	c	0.0741	1.1189	0.148	4.061e-14	-----	0	0.5552	MCV
412	rs129128	6:26125342	c	0.1416	0.2978	0.0404	1.619e-13	-----	0	0.6928	MCH
413	rs129128	6:26125342	c	0.1415	0.7022	0.11	1.736e-10	-----	0	0.6632	MCV
414	rs198812	6:26128410	g	0.1441	0.2967	0.0401	1.393e-13	-----	0	0.7425	MCH
415	rs198812	6:26128410	g	0.1439	0.6981	0.1093	1.68e-10	-----	0	0.6966	MCV
416	rs198805	6:26134672	g	0.1552	0.2616	0.0388	1.56e-11	-----	0	0.8489	MCH
417	rs198805	6:26134672	g	0.155	0.6265	0.1057	3.039e-09	-----	0	0.8929	MCV
418	rs11966360	6:26316982	g	0.1464	-0.1206	0.0215	1.973e-08	+++++++	68.9	0.003701	Hb
419	rs9467714	6:26340785	a	0.1387	-0.1289	0.0226	1.195e-08	-------	65.2	0.008461	Hb
420	rs55964643	6:26340872	g	0.4703	-0.1	0.0176	1.404e-08	++++-++	58.6	0.02443	Hb
421	rs13191659	6:27001055	g	0.0835	0.1835	0.0318	7.661e-09	-------	0	0.5603	Hb
422	rs13191659	6:27001055	g	0.0851	0.3918	0.0595	4.397e-11	-----	0	0.529	MCH
423	rs13194491	6:27037080	t	0.0879	0.1517	0.027	1.807e-08	+++++++	0	0.6811	Hb
424	rs13194491	6:27037080	t	0.0905	0.3346	0.05	2.276e-11	+++++	0	0.4891	MCH
425	rs35657082	6:27067657	t	0.0878	0.1524	0.0271	1.792e-08	-------	0	0.6487	Hb
426	rs35657082	6:27067657	t	0.0904	0.3361	0.0502	2.249e-11	-----	0	0.4846	MCH
427	rs71559014	6:27122444	g	0.0924	0.1597	0.0281	1.304e-08	-------	0	0.4937	Hb
428	rs71559014	6:27122444	g	0.095	0.3452	0.0521	3.379e-11	-----	0	0.5158	MCH
429	rs34446632	6:27209978	t	0.094	0.1586	0.0282	1.936e-08	+++++++	2.9	0.4031	Hb
430	rs34446632	6:27209978	t	0.0967	0.3427	0.0523	5.477e-11	+++++	0	0.4975	MCH
431	rs34446632	6:27209978	t	0.0969	0.7828	0.1421	3.647e-08	+++++	0	0.7194	MCV
432	6:27223966:CTCTA	6:27223966	d	0.0927	0.1634	0.0289	1.656e-08	+++++++	2.4	0.407	Hb
433	6:27223966:CTCTA	6:27223966	d	0.0954	0.3504	0.0536	6.437e-11	+++++	0	0.522	MCH
434	6:27223966:CTCTA	6:27223966:CTCTA	d	0.0957	0.8089	0.1458	2.886e-08	+++++	0	0.7251	MCV
435	rs61740410	6:27224588	a	0.0927	0.1635	0.029	1.642e-08	+++++++	1.5	0.4131	Hb
436	rs61740410	6:27224588	a	0.0955	0.3506	0.0536	6.298e-11	+++++	0	0.5248	MCH
437	rs61740410	6:27224588	a	0.0957	0.8097	0.1458	2.795e-08	+++++	0	0.7205	MCV
438	rs35416932	6:27303329	a	0.0922	0.3431	0.0554	5.762e-10	+++++	0	0.5439	MCH
439	6:27366656:CAA_C	6:27366656	d	0.1361	0.2824	0.0512	3.389e-08	+++++	0	0.5733	MCH
440	rs71559031	6:27519947	a	0.0906	0.3083	0.0539	1.043e-08	+++++	0	0.4631	MCH
441	rs34095092	6:27572234	t	0.0889	0.2768	0.0505	4.175e-08	-----	0	0.5325	MCH
442	rs13217599	6:27586230	c	0.0887	0.2769	0.0503	3.71e-08	-----	0	0.5326	MCH
443	6:135187563:T_TC	6:135187563	i	0.0985	-0.3204	0.0564	1.325e-08	-----	48.8	0.09876	MCH
444	rs73562374	6:135187749	g	0.0627	-0.5009	0.0882	1.349e-08	+++++	46.2	0.1144	MCH
445	rs13220662	6:135395548	a	0.3364	0.2703	0.041	4.307e-11	+++++	35.8	0.1827	MCH
446	rs13220662	6:135395548	a	0.336	0.6492	0.1118	6.27e-09	+++++	0	0.7571	MCV
447	rs13220662	6:135395548	a	0.3363	-0.0657	0.0087	5.956e-14	-----	0	0.6698	RCC
448	rs9402681	6:135397301	t	0.4838	0.2808	0.0463	1.326e-09	+++++	54	0.06938	MCH
449	rs9402681	6:135397301	t	0.4835	0.7252	0.1261	8.947e-09	+++++	0	0.6219	MCV
450	rs9402681	6:135397301	t	0.4839	-0.0678	0.0099	6.633e-12	-----	0	0.8076	RCC
451	rs9389263	6:135400565	a	0.4997	0.2694	0.0439	8.127e-10	+++++	56.3	0.05749	MCH
452	rs9389263	6:135400565	a	0.4994	0.693	0.1195	6.615e-09	+++++	0	0.5941	MCV
453	rs9389263	6:135400565	a	0.4997	-0.0652	0.0094	3.3e-12	-----	0	0.7459	RCC
454	rs9399136	6:135402339	c	0.2525	0.2694	0.0334	7.592e-16	-----	60.2	0.0397	MCH
455	rs9399136	6:135402339	c	0.252	0.6701	0.0911	1.885e-13	-----	17.4	0.3038	MCV
456	rs9399136	6:135402339	c	0.2523	-0.0615	0.0071	6.65e-18	+++++	0	0.6966	RCC
457	rs1331308	6:135405122	a	0.4972	-0.2723	0.0441	6.581e-10	-----	57.3	0.05249	MCH
458	rs1331308	6:135405122	a	0.4976	-0.7031	0.1201	4.762e-09	-----	0	0.5807	MCV
459	rs1331308	6:135405122	a	0.4972	0.0661	0.0094	2.068e-12	+++++	0	0.7253	RCC
460	rs949895	6:135405359	c	0.4973	-0.2724	0.0441	6.421e-10	+++++	57.3	0.05266	MCH
461	rs949895	6:135405359	c	0.4976	-0.703	0.1201	4.773e-09	+++++	0	0.5806	MCV
462	rs949895	6:135405359	c	0.4972	0.0661	0.0094	2.038e-12	-----	0	0.7258	RCC
463	rs1331309	6:135406178	g	0.2561	0.2661	0.0329	5.723e-16	-----	60.2	0.03943	MCH
464	rs1331309	6:135406178	g	0.2556	0.6631	0.0896	1.355e-13	-----	18.9	0.2941	MCV
465	rs1331309	6:135406178	g	0.256	-0.0604	0.007	7.719e-18	+++++	0	0.6849	RCC
466	rs9376090	6:135411228	c	0.2561	0.2658	0.0326	3.888e-16	-----	60.6	0.03792	MCH
467	rs9376090	6:135411228	c	0.2555	0.6633	0.089	9.007e-14	-----	22.1	0.2739	MCV
468	rs9376090	6:135411228	c	0.2559	-0.0604	0.007	4.354e-18	+++++	0	0.6665	RCC
469	rs7745098	6:135415004	c	0.4785	-0.2808	0.0451	4.885e-10	+++++	57.1	0.05333	MCH
470	rs7745098	6:135415004	c	0.4789	-0.7221	0.1229	4.238e-09	+++++	0	0.5861	MCV
471	rs7745098	6:135415004	c	0.4785	0.0694	0.0096	5.507e-13	-----	0	0.7061	RCC
472	6:135418632:TTAC_	6:135418632	d	0.26	0.2728	0.0326	6.363e-17	+++++	59.3	0.04352	MCH
473	6:135418632:TTAC_	6:135418632	d	0.2594	0.7008	0.0889	3.243e-15	+++++	15.6	0.3153	MCV
474	6:135418632:TTAC_	6:135418632	d	0.2599	-0.0625	0.007	2.836e-19	-----	0	0.6042	RCC
475	rs7776054	6:135418916	g	0.2589	0.2734	0.0326	4.852e-17	-----	59	0.04458	MCH
476	rs7776054	6:135418916	g	0.2584	0.7022	0.0888	2.575e-15	-----	15.9	0.3134	MCV
477	rs7776054	6:135418916	g	0.2589	-0.0625	0.007	2.513e-19	+++++	0	0.598	RCC
478	rs9399137	6:135419018	c	0.2589	0.2735	0.0326	4.699e-17	-----	59.2	0.04402	MCH
479	rs9399137	6:135419018	c	0.2584	0.7025	0.0888	2.495e-15	-----	16.3	0.3107	MCV
480	rs9399137	6:135419018	c	0.2589	-0.0625	0.007	2.502e-19	+++++	0	0.5978	RCC
481	rs35786788	6:135419042	a	0.2589	0.2735	0.0326	4.681e-17	+++++	59.2	0.04396	MCH
482	rs35786788	6:135419042	a	0.2584	0.7025	0.0888	2.49e-15	+++++	16.3	0.3105	MCV
483	rs35786788	6:135419042	a	0.2589	-0.0625	0.007	2.474e-19	-----	0	0.5971	RCC
484	rs9402684	6:135419305	t	0.4817	-0.2851	0.0454	3.3e-10	-----	60	0.0406	MCH
485	rs9402684	6:135419305	t	0.482	-0.7384	0.1235	2.275e-09	-----	0	0.501	MCV
486	rs9402684	6:135419305	t	0.4817	0.0695	0.0097	6.582e-13	+++++	0	0.7128	RCC
487	rs9389268	6:135419631	g	0.2589	0.2736	0.0326	4.621e-17	-----	59.2	0.04374	MCH
488	rs9389268	6:135419631	g	0.2584	0.7028	0.0888	2.457e-15	-----	16.7	0.3085	MCV
489	rs9389268	6:135419631	g	0.2589	-0.0625	0.007	2.553e-19	+++++	0	0.5969	RCC
490	rs9376091	6:135419636	t	0.2589	0.2734	0.0326	4.812e-17	+++++	59.4	0.04311	MCH
491	rs9376091	6:135419636	t	0.2584	0.7022	0.0888	2.584e-15	+++++	17.2	0.3053	MCV
492	rs9376091	6:135419636	t	0.2589	-0.0625	0.007	2.669e-19	-----	0	0.5949	RCC
493	rs9402685	6:135419688	c	0.2589	0.2734	0.0326	4.802e-17	-----	59.3	0.04338	MCH
494	rs9402685	6:135419688	c	0.2583	0.7023	0.0888	2.567e-15	-----	17.1	0.306	MCV
495	rs9402685	6:135419688	c	0.2588	-0.0625	0.007	2.649e-19	+++++	0	0.5952	RCC
496	rs7743042	6:135419834	a	0.4799	-0.2847	0.045	2.539e-10	-----	59.8	0.04143	MCH
497	rs7743042	6:135419834	a	0.4802	-0.7358	0.1226	1.951e-09	-----	0	0.5277	MCV
498	rs7743042	6:135419834	a	0.4798	0.0689	0.0096	7.416e-13	+++++	0	0.6972	RCC
499	rs34164109	6:135421176	t	0.2597	0.2744	0.0327	4.527e-17	+++++	58.7	0.04624	MCH
500	rs34164109	6:135421176	t	0.2591	0.7034	0.089	2.733e-15	+++++	15.7	0.3145	MCV
501	rs34164109	6:135421176	t	0.2597	-0.0626	0.007	2.627e-19	-----	0	0.6006	RCC
502	rs11759553	6:135422296	t	0.2701	0.2637	0.0321	2.282e-16	-----	45.7	0.118	MCH
503	rs11759553	6:135422296	t	0.2695	0.6916	0.0875	2.752e-15	-----	2.1	0.3947	MCV
504	rs11759553	6:135422296	t	0.27	-0.0585	0.0069	1.463e-17	+++++	0	0.7195	RCC
505	rs9373124	6:135423209	c	0.2701	0.2637	0.0321	2.3e-16	-----	45.7	0.1176	MCH
506	rs9373124	6:135423209	c	0.2695	0.6914	0.0875	2.792e-15	-----	2.6	0.3918	MCV
507	rs9373124	6:135423209	c	0.27	-0.0585	0.0069	1.548e-17	+++++	0	0.7204	RCC
508	rs35959442	6:135424179	g	0.2694	0.2632	0.0321	2.473e-16	-----	46.1	0.1151	MCH
509	rs35959442	6:135424179	g	0.2688	0.6922	0.0874	2.443e-15	-----	5.4	0.3762	MCV
510	rs35959442	6:135424179	g	0.2693	-0.0582	0.0069	2.186e-17	+++++	0	0.7343	RCC
511	rs6930223	6:135424203	g	0.4887	-0.2793	0.0448	4.693e-10	+++++	35.5	0.1847	MCH
512	rs6930223	6:135424203	g	0.4891	-0.7326	0.1221	1.957e-09	+++++	0	0.5575	MCV
513	rs6930223	6:135424203	g	0.4888	0.0682	0.0096	1.009e-12	-----	0	0.6604	RCC
514	rs4895440	6:135426558	t	0.2699	0.2612	0.032	3.524e-16	-----	48.7	0.099	MCH
515	rs4895440	6:135426558	t	0.2692	0.6892	0.0873	2.814e-15	-----	12.7	0.3328	MCV
516	rs4895440	6:135426558	t	0.2697	-0.0577	0.0068	3.406e-17	+++++	0	0.6998	RCC
517	rs4895441	6:135426573	g	0.2695	0.2604	0.032	4.422e-16	-----	49.7	0.09331	MCH
518	rs4895441	6:135426573	g	0.2689	0.6867	0.0873	3.552e-15	-----	15.9	0.3129	MCV
519	rs4895441	6:135426573	g	0.2693	-0.057	0.0068	7.77e-17	+++++	0	0.6855	RCC
520	rs9376092	6:135427144	a	0.2699	0.2613	0.032	3.465e-16	+++++	48.7	0.09917	MCH
521	rs9376092	6:135427144	a	0.2693	0.6898	0.0873	2.667e-15	+++++	12.6	0.3335	MCV
522	rs9376092	6:135427144	a	0.2698	-0.0577	0.0068	3.162e-17	-----	0	0.7003	RCC
523	rs9389269	6:135427159	c	0.2695	0.2605	0.032	4.329e-16	-----	49.7	0.09358	MCH
524	rs9389269	6:135427159	c	0.2689	0.6874	0.0873	3.353e-15	-----	15.8	0.3139	MCV
525	rs9389269	6:135427159	c	0.2694	-0.0571	0.0068	7.182e-17	+++++	0	0.6862	RCC
526	rs9402686	6:135427817	a	0.2689	0.2612	0.0321	4.007e-16	+++++	47.8	0.1049	MCH
527	rs9402686	6:135427817	a	0.2683	0.6873	0.0874	3.693e-15	+++++	9.5	0.3522	MCV
528	rs9402686	6:135427817	a	0.2687	-0.0572	0.0069	7.431e-17	-----	0	0.7063	RCC
529	rs7758845	6:135428537	c	0.2693	0.262	0.0321	3.207e-16	-----	46.8	0.1106	MCH
530	rs7758845	6:135428537	c	0.2687	0.6898	0.0874	2.924e-15	-----	5.9	0.3734	MCV
531	rs7758845	6:135428537	c	0.2691	-0.0578	0.0069	3.267e-17	+++++	0	0.7205	RCC
532	rs6920211	6:135431318	c	0.2476	0.2552	0.0337	3.419e-14	-----	52.4	0.07795	MCH
533	rs6920211	6:135431318	c	0.247	0.6858	0.0917	7.263e-14	-----	21.7	0.2762	MCV
534	rs6920211	6:135431318	c	0.2474	-0.0609	0.0072	2.446e-17	+++++	0	0.6736	RCC
535	rs9494142	6:135431640	c	0.2469	0.2538	0.0337	4.659e-14	-----	53.2	0.07374	MCH
536	rs9494142	6:135431640	c	0.2464	0.6811	0.0916	1.051e-13	-----	23.4	0.2656	MCV
537	rs9494142	6:135431640	c	0.2468	-0.06	0.0072	6.465e-17	+++++	0	0.6507	RCC
538	rs9494145	6:135432552	c	0.2349	0.2262	0.0335	1.52e-11	-----	53.9	0.06972	MCH
539	rs9494145	6:135432552	c	0.2344	0.6146	0.0913	1.653e-11	-----	37.5	0.1712	MCV
540	rs9494145	6:135432552	c	0.2347	-0.056	0.0072	5.196e-15	+++++	0	0.51	RCC
541	rs7766963	6:135432883	c	0.4976	-0.0542	0.0096	1.75e-08	+++++	0	0.5819	RCC
542	rs9483788	6:135435501	c	0.256	0.2108	0.0325	8.902e-11	-----	52.9	0.07514	MCH
543	rs9483788	6:135435501	c	0.2554	0.582	0.0885	4.811e-11	-----	24	0.2611	MCV
544	rs9483788	6:135435501	c	0.2557	-0.0493	0.0069	1.255e-12	+++++	0	0.7168	RCC
545	rs2026937	6:135439263	a	0.4948	0.0544	0.0099	3.516e-08	+++++	0	0.6902	RCC
546	rs6934903	6:135451564	a	0.1918	0.2106	0.0373	1.62e-08	+++++	0	0.5181	MCH
547	rs6934903	6:135451564	a	0.1916	-0.0482	0.008	1.408e-09	-----	0	0.6779	RCC
548	rs6569992	6:135452152	a	0.195	0.2074	0.0369	1.879e-08	+++++	0	0.545	MCH
549	rs6569992	6:135452152	a	0.1949	-0.0463	0.0079	4.193e-09	-----	0	0.6558	RCC
550	rs9389272	6:135459837	a	0.1946	0.203	0.0366	2.862e-08	+++++	0	0.6152	MCH
551	rs9389272	6:135459837	a	0.1944	-0.0445	0.0078	1.246e-08	-----	0	0.6796	RCC
552	rs592423	6:139840693	a	0.4462	0.4353	0.0774	1.896e-08	+++++	0	0.5936	MCV
553	rs590856	6:139844429	g	0.4463	0.4436	0.0795	2.45e-08	-----	0	0.504	MCV
554	rs8176685	9:136138765:GCGCC	d	0.1448	-0.1328	0.0232	1.083e-08	---+---	45.7	0.08654	Hb
555	rs8176685	9:136138765:GCGCC	d	0.1439	-0.5406	0.0802	1.585e-11	-----	0	0.5072	Hct
556	rs8176685	9:136138765:GCGCC	d	0.1439	-0.0533	0.0095	1.981e-08	-----	18.7	0.2956	RCC
557	rs149092047	9:136139907:GAAAC	d	0.2588	-0.1008	0.0173	5.292e-09	-------	0	0.9432	Hb
558	rs149092047	9:136139907:GAAAC	d	0.2578	-0.3519	0.0588	2.216e-09	-----	0	0.9957	Hct
559	rs2519093	9:136141870	t	0.1891	-0.1217	0.0193	2.667e-10	-------	0	0.5868	Hb
560	rs2519093	9:136141870	t	0.1902	-0.4398	0.0655	1.829e-11	-----	0	0.7131	Hct
561	rs28850884	9:136145424:AC_A	d	0.2507	-0.1035	0.0178	6.263e-09	-------	0	0.9233	Hb
562	rs28850884	9:136145424:AC_A	d	0.248	-0.3576	0.061	4.523e-09	-----	0	0.9833	Hct
563	rs9411378	9:136145425	a	0.2513	-0.1033	0.0178	6.467e-09	-------	0	0.9228	Hb
564	rs9411378	9:136145425	a	0.2485	-0.3576	0.0609	4.224e-09	-----	0	0.9838	Hct
565	rs550057	9:136146597	t	0.2619	-0.0982	0.0172	1.121e-08	-------	0	0.9477	Hb
566	rs550057	9:136146597	t	0.2608	-0.3454	0.0585	3.568e-09	-----	0	0.9811	Hct
567	rs507666	9:136149399	a	0.189	-0.1228	0.0193	1.842e-10	-------	0	0.6254	Hb
568	rs507666	9:136149399	a	0.1902	-0.4441	0.0655	1.188e-11	-----	0	0.7774	Hct
569	rs8176643	9:136149709:AC_A	d	0.1776	-0.1253	0.0199	3.368e-10	-------	0	0.717	Hb
570	rs8176643	9:136149709:AC_A	d	0.1794	-0.4607	0.0676	9.635e-12	-----	0	0.85	Hct
571	rs8176643	9:136149709:AC_A	d	0.1795	-0.0436	0.008	4.975e-08	-----	0	0.4676	RCC
572	rs532436	9:136149830	a	0.1892	-0.1219	0.0193	2.443e-10	-------	0	0.5966	Hb
573	rs532436	9:136149830	a	0.1904	-0.4418	0.0654	1.466e-11	-----	0	0.7584	Hct
574	rs600038	9:136151806	c	0.2129	-0.1021	0.0185	3.467e-08	+++++++	0	0.6909	Hb
575	rs600038	9:136151806	c	0.2146	-0.3797	0.0628	1.457e-09	+++++	0	0.7618	Hct
576	rs651007	9:136153875	t	0.2123	-0.1046	0.0185	1.623e-08	-------	0	0.6899	Hb
577	rs651007	9:136153875	t	0.2142	-0.3821	0.0628	1.153e-09	-----	0	0.7517	Hct
578	rs579459	9:136154168	c	0.2123	-0.1045	0.0185	1.631e-08	+++++++	0	0.6901	Hb
579	rs579459	9:136154168	c	0.2142	-0.382	0.0628	1.16e-09	+++++	0	0.7517	Hct
580	rs649129	9:136154304	t	0.2123	-0.1053	0.0185	1.291e-08	-------	0	0.6921	Hb
581	rs649129	9:136154304	t	0.2142	-0.3822	0.0628	1.14e-09	-----	0	0.747	Hct
582	rs495828	9:136154867	t	0.2123	-0.1051	0.0185	1.368e-08	-------	0	0.6845	Hb
583	rs495828	9:136154867	t	0.2141	-0.3821	0.0628	1.172e-09	-----	0	0.737	Hct
584	rs635634	9:136155000	t	0.1894	-0.1205	0.0193	3.857e-10	-------	0	0.575	Hb
585	rs635634	9:136155000	t	0.1906	-0.4393	0.0654	1.898e-11	-----	0	0.7546	Hct
586	rs130605	22:37410368	a	0.4726	-0.2258	0.0377	2.084e-09	-----	65.3	0.02123	MCH
587	rs4821582	22:37411180	a	0.446	0.2128	0.035	1.239e-09	+++++	0	0.4326	MCH
588	rs4821583	22:37411190	c	0.446	0.213	0.035	1.193e-09	-----	0	0.4371	MCH
589	rs4821584	22:37411207	t	0.446	0.2132	0.035	1.14e-09	+++++	0	0.4354	MCH
590	rs6000534	22:37411582	g	0.4476	0.2131	0.035	1.086e-09	-----	0	0.4334	MCH
591	rs5756485	22:37412133	c	0.443	0.2227	0.0351	2.215e-10	-----	9.5	0.3519	MCH
592	rs5750370	22:37412967	a	0.2743	0.283	0.0513	3.352e-08	+++++	0	0.89	MCH
593	rs5756487	22:37416800	t	0.4964	0.2515	0.0352	9.758e-13	-----	62.3	0.03114	MCH
594	rs5756488	22:37416803	a	0.3028	0.3096	0.048	1.13e-10	+++++	1.7	0.3966	MCH
595	rs5756489	22:37417197	t	0.4892	-0.2548	0.0355	7.255e-13	-----	63.4	0.02729	MCH
596	rs4821585	22:37419220	t	0.4848	-0.2575	0.0356	4.75e-13	-----	62.3	0.03149	MCH
597	rs5756490	22:37421603	t	0.2692	0.2946	0.0521	1.513e-08	+++++	0	0.7491	MCH
598	rs68159414	22:37421604	c	0.2692	0.2948	0.0521	1.481e-08	-----	0	0.7495	MCH
599	rs5756491	22:37421702	a	0.4882	-0.2595	0.0358	4.118e-13	-----	63.9	0.02574	MCH
600	rs3753144	22:37423485	a	0.2642	0.308	0.0517	2.467e-09	+++++	0	0.4212	MCH
601	rs8141597	22:37424848	c	0.3203	0.3049	0.048	2.085e-10	-----	3.4	0.3875	MCH
602	rs5750373	22:37425031	a	0.3773	0.3129	0.0439	9.974e-13	+++++	48.2	0.1021	MCH
603	rs228129	22:37428599	a	0.4207	0.3398	0.0405	5.102e-17	+++++	49	0.09744	MCH
604	rs228129	22:37428599	a	0.4206	0.6728	0.1104	1.091e-09	+++++	0	0.603	MCV
605	rs135167	22:37429129	c	0.4371	0.3349	0.0397	3.546e-17	-----	49.7	0.09335	MCH
606	rs135167	22:37429129	c	0.437	0.665	0.1082	7.966e-10	-----	0	0.5873	MCV
607	rs130610	22:37431871	t	0.4388	0.3338	0.0399	5.625e-17	+++++	50.3	0.08964	MCH
608	rs130610	22:37431871	t	0.4387	0.6643	0.1086	9.437e-10	+++++	0	0.5919	MCV
609	rs228131	22:37432243	g	0.4364	0.3354	0.0397	2.845e-17	-----	50.7	0.0873	MCH
610	rs228131	22:37432243	g	0.4363	0.6681	0.1081	6.3e-10	-----	0	0.5584	MCV
611	rs9610635	22:37432421	t	0.3191	0.2962	0.0448	3.848e-11	+++++	63.7	0.0264	MCH
612	rs130613	22:37432632	a	0.4426	0.3374	0.0398	2.299e-17	+++++	49.2	0.09622	MCH
613	rs130613	22:37432632	a	0.4425	0.6745	0.1084	4.828e-10	+++++	0	0.6338	MCV
614	rs25095	22:37434028	g	0.436	0.3304	0.0392	3.716e-17	-----	49.7	0.09313	MCH
615	rs25095	22:37434028	g	0.4358	0.6629	0.1069	5.503e-10	-----	0	0.5882	MCV
616	rs9610636	22:37434773	g	0.3187	0.2959	0.0443	2.342e-11	-----	62.8	0.02939	MCH
617	rs130618	22:37435443	t	0.4386	0.3286	0.039	3.394e-17	-----	50.9	0.08621	MCH
618	rs130618	22:37435443	t	0.4385	0.6585	0.1061	5.451e-10	-----	0	0.5666	MCV
619	rs7287890	22:37436343	a	0.3187	0.2965	0.0443	2.092e-11	+++++	62.1	0.03201	MCH
620	rs130619	22:37436348	t	0.436	0.3295	0.0392	4.194e-17	+++++	48.9	0.09812	MCH
621	rs130619	22:37436348	t	0.4359	0.6613	0.1067	5.781e-10	+++++	0	0.5919	MCV
622	rs130621	22:37437354	g	0.436	0.3297	0.0392	3.863e-17	-----	48.8	0.09857	MCH
623	rs130621	22:37437354	g	0.4359	0.6616	0.1067	5.591e-10	-----	0	0.5904	MCV
624	rs9607408	22:37437831	c	0.3125	0.3017	0.0451	2.321e-11	-----	62.4	0.03106	MCH
625	rs130624	22:37438651	g	0.4344	0.3298	0.0393	4.549e-17	-----	48.4	0.1012	MCH
626	rs130624	22:37438651	g	0.4343	0.6597	0.1069	6.836e-10	-----	0	0.597	MCV
627	rs5756495	22:37438728	t	0.3129	0.3027	0.0452	2.11e-11	+++++	60.7	0.03744	MCH
628	rs7285681	22:37439701	c	0.318	0.2934	0.0442	3.123e-11	+++++	61.8	0.03334	MCH
629	22:37441417:T_TG	22:37441417	i	0.3143	0.3088	0.0451	7.886e-12	+++++	65	0.02218	MCH
630	rs5756497	22:37444960	a	0.3186	0.2948	0.0439	1.808e-11	+++++	61.3	0.03499	MCH
631	rs9610638	22:37445668	t	0.4781	-0.3383	0.036	5.702e-21	-----	66.5	0.01783	MCH
632	rs9610638	22:37445668	t	0.4783	-0.6954	0.098	1.318e-12	-----	48.9	0.09794	MCV
633	rs11913810	22:37447046	c	0.1202	0.4127	0.0757	4.953e-08	+++++	7.5	0.3638	MCH
634	22:37454545:AT_A	22:37454545	d	0.3049	0.3304	0.0429	1.288e-14	+++++	63.2	0.02799	MCH
635	22:37454545:AT_A	22:37454545	d	0.3049	0.6583	0.1167	1.695e-08	+++++	34.9	0.1887	MCV
636	rs760719	22:37460449	t	0.429	-0.3065	0.0303	4.014e-24	-----	59.2	0.04379	MCH
637	rs760719	22:37460449	t	0.4283	-0.0882	0.0161	3.937e-08	-----	42.5	0.1385	MCHC
638	rs760719	22:37460449	t	0.4291	-0.643	0.0824	6.194e-15	-----	17.2	0.3053	MCV
639	rs2235321	22:37462926	a	0.3934	0.1016	0.0183	2.675e-08	++++-++	0	0.6178	Hb
640	rs2235321	22:37462926	a	0.3945	0.2929	0.0345	1.935e-17	+++++	33.9	0.1953	MCH
641	rs2235321	22:37462926	a	0.3946	0.6287	0.0939	2.113e-11	+++++	0	0.4272	MCV
642	rs855791	22:37462936	a	0.4319	-0.2928	0.0286	1.572e-24	-----	50.2	0.09066	MCH
643	rs855791	22:37462936	a	0.4319	-0.6324	0.0781	5.399e-16	-----	0	0.4749	MCV
644	rs6000550	22:37463450	t	0.167	0.2827	0.0506	2.256e-08	++-++	30.7	0.2167	MCH
645	rs877908	22:37464624	c	0.4082	0.101	0.0178	1.268e-08	----+--	0	0.4513	Hb
646	rs877908	22:37464624	c	0.4093	0.3099	0.0333	1.425e-20	-----	53.1	0.07424	MCH
647	rs877908	22:37464624	c	0.4093	0.6479	0.0908	9.731e-13	-----	0	0.4849	MCV
648	rs200434923	22:37465385	d	0.3822	0.2888	0.037	5.947e-15	+++++	40	0.1548	MCH
649	rs200434923	22:37465385	d	0.3822	0.6016	0.1007	2.32e-09	+++++	11.4	0.3411	MCV
650	rs5756504	22:37467270	t	0.3768	0.1	0.0183	4.517e-08	++++-++	0	0.4233	Hb
651	rs5756504	22:37467270	t	0.3776	0.2902	0.0344	3.104e-17	+++++	50.9	0.08633	MCH
652	rs5756504	22:37467270	t	0.3776	0.6068	0.0936	8.981e-11	+++++	12.9	0.3317	MCV
653	rs5756505	22:37467354	c	0.4071	0.1008	0.0177	1.348e-08	++++-++	0	0.4335	Hb
654	rs5756505	22:37467354	c	0.4081	0.3087	0.0333	1.896e-20	+++++	54.8	0.06508	MCH
655	rs5756505	22:37467354	c	0.4081	0.6434	0.0907	1.342e-12	+++++	0	0.4398	MCV
656	rs5756506	22:37467392	c	0.3768	0.1	0.0183	4.398e-08	++++-++	0.5	0.42	Hb
657	rs5756506	22:37467392	c	0.3776	0.29	0.0344	3.222e-17	+++++	51.3	0.08421	MCH
658	rs5756506	22:37467392	c	0.3777	0.6064	0.0936	9.133e-11	+++++	14	0.3253	MCV
659	rs6000553	22:37469192	a	0.4621	-0.2908	0.0288	5.22e-24	-----	64.4	0.02409	MCH
660	rs6000553	22:37469192	a	0.4609	-0.084	0.0153	3.889e-08	-----	44.5	0.1254	MCHC
661	rs6000553	22:37469192	a	0.4622	-0.6077	0.0784	9.289e-15	-----	33.2	0.2002	MCV
662	rs4820268	22:37469591	g	0.4586	-0.2844	0.0283	1.032e-23	+++++	64.9	0.02255	MCH
663	rs4820268	22:37469591	g	0.4575	-0.0838	0.015	2.464e-08	+++++	46.5	0.1128	MCHC
664	rs4820268	22:37469591	g	0.4587	-0.588	0.0772	2.592e-14	+++++	32.9	0.2017	MCV
665	rs2076085	22:37470041	c	0.4575	-0.285	0.0284	1.059e-23	+++++	64.5	0.02374	MCH
666	rs2076085	22:37470041	c	0.4564	-0.0841	0.0151	2.409e-08	+++++	46.4	0.1131	MCHC
667	rs2076085	22:37470041	c	0.4576	-0.5887	0.0774	2.79e-14	+++++	32.5	0.2045	MCV
668	rs2413450	22:37470224	t	0.4561	-0.2849	0.0285	1.352e-23	-----	63.4	0.02728	MCH
669	rs2413450	22:37470224	t	0.455	-0.0846	0.0151	2.147e-08	-----	45.5	0.1187	MCHC
670	rs2413450	22:37470224	t	0.4562	-0.5872	0.0776	3.7e-14	-----	31	0.2151	MCV
671	rs2076086	22:37470536	t	0.3742	0.0995	0.0182	4.508e-08	++++-++	6.5	0.3781	Hb
672	rs2076086	22:37470536	t	0.3749	0.28	0.0342	2.518e-16	+++++	52.5	0.07746	MCH
673	rs2076086	22:37470536	t	0.375	0.5753	0.093	6.276e-10	+++++	14.2	0.3239	MCV
674	rs2072860	22:37470604	g	0.4594	-0.2859	0.0285	1.215e-23	+++++	65.4	0.02107	MCH
675	rs2072860	22:37470604	g	0.4583	-0.0846	0.0151	2.27e-08	+++++	47.3	0.1076	MCHC
676	rs2072860	22:37470604	g	0.4595	-0.5889	0.0777	3.592e-14	+++++	34.4	0.192	MCV
677	rs9610643	22:37471385	a	0.2908	0.3238	0.0427	3.354e-14	+++++	49.1	0.09693	MCH
678	rs9610643	22:37471385	a	0.291	0.6626	0.1162	1.17e-08	+++++	25.5	0.2515	MCV
679	rs855788	22:37474079	a	0.422	0.2398	0.0329	3.34e-13	+++++	25.6	0.2509	MCH
680	rs855788	22:37474079	a	0.4223	0.5081	0.0898	1.504e-08	+++++	0	0.5087	MCV
681	22:37474892:AGGAG	22:37474892	d	0.3768	0.2133	0.0334	1.791e-10	+++++	40.2	0.1533	MCH
682	rs56270606	22:37477582	t	0.2146	-0.1931	0.0348	3.024e-08	-----	14.3	0.3234	MCH
683	rs2743820	22:37477970	c	0.3678	0.1982	0.0314	2.817e-10	-----	47.1	0.1091	MCH
684	rs7286184	22:37478775	g	0.2146	-0.1931	0.0348	2.971e-08	+++++	14.4	0.3223	MCH
685	rs2543521	22:37480155	t	0.2146	-0.1931	0.0348	3.005e-08	-----	14.3	0.3234	MCH
686	rs2543520	22:37480181	g	0.2146	-0.1931	0.0348	3.005e-08	+++++	14.3	0.3234	MCH
687	rs2111833	22:37480797	t	0.3662	0.1968	0.0315	4.198e-10	+++++	46.4	0.1134	MCH
688	rs2235325	22:37481637	t	0.2146	-0.1933	0.0349	3.024e-08	-----	12.7	0.3332	MCH
689	rs5756507	22:37483481	g	0.4216	0.1892	0.0289	5.947e-11	-----	34.1	0.1938	MCH
690	rs11089821	22:37483691	g	0.4183	0.1897	0.0291	7.033e-11	-----	32.5	0.205	MCH
691	rs9607412	22:37484337	c	0.4177	0.1859	0.0287	9.191e-11	-----	37.3	0.1727	MCH
692	rs9610646	22:37484374	g	0.3901	0.1691	0.0291	6.334e-09	-----	44.4	0.1262	MCH
693	rs9610647	22:37484944	a	0.389	0.1678	0.0291	7.682e-09	+++++	45.1	0.1218	MCH
694	rs2235323	22:37485193	c	0.3912	0.1706	0.0292	5.027e-09	-----	45.5	0.1191	MCH
695	rs2235324	22:37485724	c	0.389	0.1678	0.0291	7.691e-09	-----	45	0.1219	MCH
696	rs736852	22:37486205	c	0.4176	0.1857	0.0287	9.648e-11	-----	36.9	0.1751	MCH
697	rs2019848	22:37486265	a	0.2158	-0.194	0.0349	2.739e-08	-----	3.6	0.3861	MCH
698	rs738295	22:37486866	g	0.3889	0.1672	0.0291	8.96e-09	-----	44.8	0.1232	MCH
699	rs4328728	22:37487529	t	0.4175	0.1853	0.0287	1.072e-10	+++++	37.3	0.1723	MCH
700	rs5756508	22:37487659	g	0.4174	0.1851	0.0287	1.122e-10	-----	37.3	0.1724	MCH
701	rs5756509	22:37487687	a	0.4185	0.1871	0.0289	1.006e-10	+++++	31.1	0.2141	MCH
702	rs1421312	22:37487810	g	0.3905	0.1656	0.0292	1.348e-08	-----	44.3	0.1265	MCH
703	rs2743822	22:37488574	t	0.415	0.1843	0.0289	1.687e-10	+++++	37.3	0.1728	MCH
704	rs5756510	22:37488850	t	0.4172	0.1835	0.0287	1.658e-10	-----	37.2	0.173	MCH
705	rs2543515	22:37488981	g	0.4173	0.1835	0.0287	1.661e-10	-----	37.3	0.1728	MCH
706	rs2543514	22:37489274	c	0.4172	0.1831	0.0287	1.814e-10	+++++	37.2	0.1731	MCH
707	rs5750378	22:37489730	t	0.4172	0.1827	0.0287	1.998e-10	+++++	37.5	0.1712	MCH
708	rs12172465	22:37489773	t	0.4171	0.1825	0.0287	2.082e-10	+++++	37.3	0.1725	MCH
709	rs6000567	22:37489880	t	0.4171	0.182	0.0287	2.306e-10	+++++	37.4	0.172	MCH
710	rs5750379	22:37490005	g	0.4181	0.1829	0.0288	2.025e-10	-----	38.4	0.1654	MCH
711	rs5750380	22:37490033	g	0.417	0.1815	0.0287	2.596e-10	-----	37.3	0.1727	MCH
712	rs2543513	22:37490396	g	0.4169	0.1808	0.0287	2.986e-10	-----	37.5	0.1714	MCH
713	rs2413451	22:37490691	g	0.4168	0.1806	0.0287	3.081e-10	-----	37.8	0.1693	MCH
714	rs2251655	22:37490692	t	0.4168	0.1806	0.0287	3.13e-10	+++++	37.9	0.1683	MCH
715	rs2543511	22:37491140	g	0.4167	0.1802	0.0287	3.49e-10	-----	38	0.1676	MCH
716	rs5756511	22:37491150	t	0.3882	0.1624	0.0291	2.419e-08	+++++	43.4	0.1322	MCH
717	rs2743824	22:37491545	c	0.4165	0.1796	0.0287	3.905e-10	-----	38.8	0.1624	MCH
718	rs2543510	22:37491822	a	0.3895	0.1643	0.0292	1.762e-08	+++++	43	0.1351	MCH
719	rs2543509	22:37491839	g	0.4183	0.1821	0.0288	2.54e-10	-----	40.5	0.151	MCH
720	rs2743825	22:37492201	g	0.4184	0.1822	0.0288	2.509e-10	-----	40.5	0.1512	MCH
721	rs5756512	22:37492585	t	0.3902	0.1647	0.0292	1.683e-08	+++++	45.3	0.1206	MCH
722	rs55747547	22:37493863	t	0.2947	0.2829	0.0485	5.265e-09	+++++	20.1	0.287	MCH
723	rs35771797	22:37494201	c	0.2116	-0.2313	0.041	1.635e-08	+++++	0	0.4484	MCH
724	rs732755	22:37494318	c	0.2116	-0.2316	0.041	1.587e-08	+++++	0	0.4497	MCH
725	rs732756	22:37494420	c	0.2116	-0.2313	0.041	1.646e-08	+++++	0	0.4478	MCH
726	rs8139988	22:37494721	c	0.2117	-0.2314	0.041	1.634e-08	+++++	0	0.4505	MCH
727	rs228904	22:37494814	g	0.2117	-0.2309	0.041	1.783e-08	+++++	0	0.4549	MCH
728	rs2017764	22:37494915	a	0.3903	0.192	0.0331	6.436e-09	+++++	39.2	0.1596	MCH
729	rs2281090	22:37495370	a	0.2074	-0.2386	0.0416	9.847e-09	-----	1.6	0.3972	MCH
730	rs2281091	22:37495550	t	0.2061	-0.2399	0.0419	1.072e-08	-----	0	0.4059	MCH
731	rs2281092	22:37495635	a	0.2061	-0.2398	0.0419	1.087e-08	-----	0	0.4079	MCH
732	rs9610649	22:37496127	t	0.3807	0.1914	0.034	1.904e-08	+++++	37.4	0.1717	MCH
733	rs4560232	22:37496283	a	0.3764	0.1908	0.0342	2.345e-08	+++++	33.9	0.1955	MCH
734	rs7289616	22:37496410	a	0.3785	0.1889	0.0339	2.609e-08	+++++	38.2	0.1666	MCH
735	rs55945931	22:37496460	t	0.3783	0.1897	0.034	2.335e-08	-----	38.6	0.1636	MCH
736	rs9619658	22:37496847	t	0.3396	0.2285	0.0389	4.245e-09	+++++	19.9	0.2877	MCH

## Sheet: Non-overlapping
Index	Marker Name	Position (chr:bp)	Trait
1	rs181058325	6:25314597	MCH
2	6:25335967	6:25335967	MCH
3	rs78839652	6:25344487	MCH
4	rs115103534	6:25344680	MCH
5	rs115862270	6:25344734	MCH
6	rs78280411	6:25345037	MCH
7	rs79693813	6:25345251	MCH
8	rs77436908	6:25345356	MCH
9	rs79840009	6:25345558	MCH
10	rs142634419	6:25345974	MCH
11	rs116626667	6:25346414	MCH
12	rs74412351	6:25347728	MCH
13	rs79118127	6:25348062	MCH
14	rs59821513	6:25348490	MCH
15	rs139436607	6:25348616	MCH
16	rs76546740	6:25349053	MCH
17	rs76725563	6:25349257	MCH
18	rs77482574	6:25349651	MCH
19	rs145655407	6:25350157	MCH
20	rs76537146	6:25350708	MCH
21	rs77192487	6:25350760	MCH
22	rs115639976	6:25353334	MCH
23	rs1883392	6:25354122	MCH
24	rs79609187	6:25354424	MCH
25	rs75352650	6:25354449	MCH
26	rs7748771	6:25355099	MCH
27	rs7749494	6:25355304	MCH
28	6:25357208:G_GGG	6:25357208:G_GGG	MCH
29	rs140916016	6:25357564	MCH
30	rs79441875	6:25357636	MCH
31	rs80112394	6:25358611	MCH
32	rs79225889	6:25363472	MCH
33	rs76300007	6:25363553	MCH
34	rs78578594	6:25364645	MCH
35	rs115869907	6:25365901	MCH
36	rs78536796	6:25370583	MCH
37	6:25372632:ATTAT	6:25372632:ATTAT	MCH
38	rs111722075	6:25374046	MCH
39	rs115425228	6:25383017	MCH
40	rs79222483	6:25384820	MCH
41	rs76118339	6:25385969	MCH
42	rs79248604	6:25391837	MCH
43	rs192533405	6:25392326	MCH
44	rs74589007	6:25393235	MCH
45	rs17316893	6:25394439	MCH
46	rs2149227	6:25397289	MCH
47	rs17251430	6:25398003	MCH
48	rs985984	6:25402179	MCH
49	rs115235757	6:25404898	MCH
50	rs79794948	6:25406036	MCH
51	rs79665799	6:25408104	MCH
52	rs72831276	6:25452783	Hb, MCH
53	rs74662487	6:25453057	Hb, MCH
54	rs2274089	6:25488583	MCH
55	rs17318575	6:25493238	MCH
56	6:25510696:CAT_C	6:25510696:CAT_C	Hb, MCH
57	rs55728843	6:25515150	Hb, MCH
58	rs149359690	6:25526319	Hb, MCH, MCV
59	rs77244967	6:25536591	Hb, MCH
60	rs79580305	6:25538447	Hb, MCH
61	rs115074093	6:25543913	Hb, MCH, MCV
62	rs78975171	6:25554911	Hb, MCH
63	rs75580845	6:25578433	Hb, MCH, MCV
64	rs79681349	6:25582712	Hb, MCH, MCV
65	rs78341453	6:25584831	Hb, MCH
66	rs75865451	6:25588285	Hb, MCH
67	rs17492120	6:25590311	Hb, MCH
68	6:25590833:A_AT	6:25590833:A_AT	Hb, MCH
69	rs75063949	6:25591041	Hb, MCH
70	rs77346695	6:25600233	Hb, MCH
71	rs41271823	6:25601089	Hb, MCH
72	rs7747371	6:25603102	Hb, MCH, MCV
73	rs114891703	6:25604193	Hb, MCH, MCV
74	rs75080831	6:25611826	Hb, MCH
75	rs78912080	6:25616453	Hb, MCH, MCV
76	rs3804103	6:25617291	Hb, MCH
77	rs78151190	6:25619007	Hb, MCH
78	rs7765813	6:25624395	Hb, MCH, MCV
79	rs990850	6:25628511	Hb, MCH, MCV
80	rs9467545	6:25638464	MCH
81	rs1923027	6:25647354	MCH
82	rs9467550	6:25653401	MCH, MCV
83	rs56329220	6:25657845	MCH, MCV
84	rs72838858	6:25659305	MCH
85	rs1321247	6:25662873	Hb, MCH, MCV
86	rs56246159	6:25668700	MCH
87	rs56206297	6:25669278	MCH
88	rs2876691	6:25669525	MCH
89	rs2328891	6:25669669	MCH
90	rs72838866	6:25673273	MCH
91	rs9366626	6:25684953	MCH
92	rs2205936	6:25685492	MCH
93	rs4478398	6:25694684	MCH
94	rs76703022	6:25703529	MCH
95	rs116009877	6:25715657	Hb, MCH, MCV
96	rs9358870	6:25719210	MCH
97	6:25721594:TGACA	6:25721594:TGACA	MCH
98	rs12191655	6:25803095	MCH
99	rs78833965	6:25804921	Hb, MCH, MCV
100	rs17342717	6:25821770	Hb, MCH, MCV
101	rs80176492	6:25828106	Hb, MCH, MCV
102	rs1408272	6:25842951	Hb, MCH, MCV
103	rs79920061	6:25857920	Hb, MCH, MCV
104	6:25866075	6:25866075	Hb, MCH, MCV
105	rs55925606	6:25878848	Hb, MCH, MCV
106	rs80215559	6:25918225	Hb, MCH, MCV
107	6:25921812:TTAG_	6:25921812:TTAG_	MCH, MCV
108	rs169219	6:25957392	Hb
109	rs12210098	6:25963966	Hb, MCH, MCV
110	rs1436310	6:25969958	Hb, MCH, MCV
111	rs1436309	6:25970109	Hb, MCH, MCV
112	rs72832602	6:25978402	MCH, MCV
113	rs9379814	6:25979869	Hb, MCH, MCV
114	rs9379815	6:25980116	Hb, MCH, MCV
115	rs1130000	6:25985396	Hb, MCH, MCV
116	6:25987435:C_CA	6:25987435:C_CA	Hb, MCH, MCV
117	6:25987438:CCCG_	6:25987438:CCCG_	Hb, MCH
118	6:25987439:CCG_C	6:25987439:CCG_C	MCH
119	rs7766267	6:25990474	MCH, MCV
120	rs7766342	6:25990674	Hb, MCH, MCV
121	rs7752351	6:25990842	MCH, MCV
122	rs9461229	6:25992279	Hb, MCH, MCV
123	rs2032450	6:25993114	Hb, MCH, MCV
124	rs9467656	6:25993559	Hb, MCH, MCV
125	rs2013063	6:25994098	Hb, MCH, MCV
126	rs6928951	6:25995554	Hb, MCH, MCV
127	rs12216125	6:25997458	Hb, MCH, MCV
128	rs9348704	6:26000393	Hb, MCH, MCV
129	rs72834621	6:26005023	MCH, MCV
130	rs9393681	6:26008260	Hb, MCH, MCV
131	rs9356996	6:26008487	MCH
132	rs9467658	6:26010881	Hb, MCH, MCV
133	rs9461230	6:26019240	Hb, MCH, MCV
134	rs72834627	6:26019411	MCH, MCV
135	rs2157050	6:26020431	MCH, MCV
136	rs9467662	6:26021327	MCH, MCV
137	rs9467663	6:26021456	MCH, MCV
138	rs72834629	6:26023032	Hb, MCH, MCV
139	rs9379818	6:26023206	Hb, MCH, MCV
140	6:26024877:GA_G	6:26024877:GA_G	Hb, MCH, MCV
141	rs72834630	6:26025186	MCH, MCV
142	rs2032449	6:26026599	MCH, MCV
143	rs3752420	6:26027135	MCH, MCV
144	rs3752419	6:26027433	MCH, MCV
145	rs7753253	6:26030710	Hb, MCH, MCV
146	rs112370520	6:26036092	MCH, MCV
147	rs72834643	6:26041986	MCH, MCV
148	rs6938083	6:26042710	Hb, MCH, MCV
149	rs72834647	6:26043393	MCH, MCV
150	rs2032446	6:26044729	Hb, MCH, MCV
151	rs2032445	6:26044812	Hb, MCH, MCV
152	rs2032444	6:26046744	Hb, MCH, MCV
153	rs2032443	6:26046802	MCH, MCV
154	rs10807006	6:26048752	MCH, MCV
155	rs10807007	6:26048931	Hb, MCH, MCV
156	rs7772312	6:26049616	MCH, MCV
157	rs9379819	6:26049819	Hb, MCH, MCV
158	rs9379820	6:26049924	MCH, MCV
159	rs6928717	6:26053264	Hb, MCH, MCV
160	rs9379821	6:26054268	MCH, MCV
161	rs9358902	6:26058570	MCH, MCV
162	rs9358903	6:26061949	Hb, MCH, MCV
163	rs9348706	6:26065481	MCH, MCV
164	rs9393683	6:26066198	Hb, MCH, MCV
165	rs9358904	6:26068566	Hb, MCH, MCV
166	rs9295684	6:26069669	Hb, MCH, MCV
167	6:26071027:T_TCA	6:26071027:T_TCA	MCH, MCV
168	rs2051544	6:26071093	Hb, MCH, MCV
169	rs9295685	6:26071725	Hb, MCH, MCV
170	rs9968910	6:26072095	Hb, MCH, MCV
171	rs9366634	6:26072396	Hb, MCH, MCV
172	rs6942196	6:26072804	Hb, MCH, MCV
173	rs144861591	6:26072992	Hb, MCH, MCV
174	rs7738854	6:26073295	Hb, MCH, MCV
175	rs1539183	6:26075051	MCH, MCV
176	rs9393684	6:26075531	Hb, MCH, MCV
177	rs9358905	6:26077839	Hb, MCH, MCV
178	rs9379823	6:26077947	MCH, MCV
179	rs9366636	6:26078232	MCH, MCV
180	rs9356998	6:26078544	MCH, MCV
181	rs10946807	6:26079638	Hb, MCH, MCV
182	rs2876694	6:26080750	MCH, MCV
183	rs2328905	6:26081582	MCH, MCV
184	rs9295686	6:26081983	MCH, MCV
185	6:26082215:GC_G	6:26082215:GC_G	MCH, MCV
186	rs111663960	6:26082220	MCH, MCV
187	rs9295687	6:26082710	MCH, MCV
188	rs4529296	6:26083135	MCH, MCV
189	rs9379825	6:26083871	MCH, MCV
190	rs9467672	6:26083904	MCH, MCV
191	rs9295688	6:26084217	MCH, MCV
192	rs1971509	6:26085777	MCH, MCV
193	rs2006736	6:26086017	MCH, MCV
194	rs1800702	6:26086463	MCH, MCV
195	rs1061482	6:26086699	MCH, MCV
196	rs2794720	6:26087202	MCH, MCV
197	rs2858993	6:26087856	MCH, MCV
198	rs2794719	6:26088890	Hb, MCH, MCV
199	rs1799945	6:26091179	MCH, MCV
200	rs2032451	6:26092170	MCH, MCV
201	rs1800562	6:26093141	Hb, MCH, MCV
202	rs79220007	6:26098474	Hb, MCH, MCV
203	rs198851	6:26104632	MCH, MCV
204	rs198846	6:26107463	MCH, MCV
205	rs198833	6:26114508	MCH, MCV
206	6:26118437:CA_C	6:26118437:CA_C	MCH, MCV
207	6:26118537:CTCAA	6:26118537:CTCAA	MCH, MCV
208	6:26123502	6:26123502	Hb, MCH, MCV
209	rs129128	6:26125342	MCH, MCV
210	rs198812	6:26128410	MCH, MCV
211	rs198805	6:26134672	MCH, MCV
212	rs11966360	6:26316982	Hb
213	rs9467714	6:26340785	Hb
214	rs55964643	6:26340872	Hb
215	rs13191659	6:27001055	Hb, MCH
216	rs13194491	6:27037080	Hb, MCH
217	rs35657082	6:27067657	Hb, MCH
218	rs71559014	6:27122444	Hb, MCH
219	rs34446632	6:27209978	Hb, MCH, MCV
220	6:27223966:CTCTA	6:27223966:CTCTA	Hb, MCH, MCV
221	rs61740410	6:27224588	Hb, MCH, MCV
222	rs35416932	6:27303329	MCH
223	6:27366656:CAA_C	6:27366656:CAA_C	MCH
224	rs71559031	6:27519947	MCH
225	rs34095092	6:27572234	MCH
226	rs13217599	6:27586230	MCH
227	6:135187563:T_TC	6:135187563:T_TC	MCH
228	rs73562374	6:135187749	MCH
229	rs13220662	6:135395548	MCH, MCV, RCC
230	rs9402681	6:135397301	MCH, MCV, RCC
231	rs9389263	6:135400565	MCH, MCV, RCC
232	rs9399136	6:135402339	MCH, MCV, RCC
233	rs1331308	6:135405122	MCH, MCV, RCC
234	rs949895	6:135405359	MCH, MCV, RCC
235	rs1331309	6:135406178	MCH, MCV, RCC
236	rs9376090	6:135411228	MCH, MCV, RCC
237	rs7745098	6:135415004	MCH, MCV, RCC
238	6:135418632:TTAC_	6:135418632:TTAC_	MCH, MCV, RCC
239	rs7776054	6:135418916	MCH, MCV, RCC
240	rs9399137	6:135419018	MCH, MCV, RCC
241	rs35786788	6:135419042	MCH, MCV, RCC
242	rs9402684	6:135419305	MCH, MCV, RCC
243	rs9389268	6:135419631	MCH, MCV, RCC
244	rs9376091	6:135419636	MCH, MCV, RCC
245	rs9402685	6:135419688	MCH, MCV, RCC
246	rs7743042	6:135419834	MCH, MCV, RCC
247	rs34164109	6:135421176	MCH, MCV, RCC
248	rs11759553	6:135422296	MCH, MCV, RCC
249	rs9373124	6:135423209	MCH, MCV, RCC
250	rs35959442	6:135424179	MCH, MCV, RCC
251	rs6930223	6:135424203	MCH, MCV, RCC
252	rs4895440	6:135426558	MCH, MCV, RCC
253	rs4895441	6:135426573	MCH, MCV, RCC
254	rs9376092	6:135427144	MCH, MCV, RCC
255	rs9389269	6:135427159	MCH, MCV, RCC
256	rs9402686	6:135427817	MCH, MCV, RCC
257	rs7758845	6:135428537	MCH, MCV, RCC
258	rs6920211	6:135431318	MCH, MCV, RCC
259	rs9494142	6:135431640	MCH, MCV, RCC
260	rs9494145	6:135432552	MCH, MCV, RCC
261	rs7766963	6:135432883	RCC
262	rs9483788	6:135435501	MCH, MCV, RCC
263	rs2026937	6:135439263	RCC
264	rs6934903	6:135451564	MCH, RCC
265	rs6569992	6:135452152	MCH, RCC
266	rs9389272	6:135459837	MCH, RCC
267	rs592423	6:139840693	MCV
268	rs590856	6:139844429	MCV
269	rs8176685	9:136138765:GCGCC	Hb, Hct, RCC
270	rs149092047	9:136139907:GAAAC	Hb, Hct
271	rs2519093	9:136141870	Hb, Hct
272	rs28850884	9:136145424:AC_A	Hb, Hct
273	rs9411378	9:136145425	Hb, Hct
274	rs550057	9:136146597	Hb, Hct
275	rs507666	9:136149399	Hb, Hct
276	rs8176643	9:136149709:AC_A	Hb, Hct, RCC
277	rs532436	9:136149830	Hb, Hct
278	rs600038	9:136151806	Hb, Hct
279	rs651007	9:136153875	Hb, Hct
280	rs579459	9:136154168	Hb, Hct
281	rs649129	9:136154304	Hb, Hct
282	rs495828	9:136154867	Hb, Hct
283	rs635634	9:136155000	Hb, Hct
284	rs130605	22:37410368	MCH
285	rs4821582	22:37411180	MCH
286	rs4821583	22:37411190	MCH
287	rs4821584	22:37411207	MCH
288	rs6000534	22:37411582	MCH
289	rs5756485	22:37412133	MCH
290	rs5750370	22:37412967	MCH
291	rs5756487	22:37416800	MCH
292	rs5756488	22:37416803	MCH
293	rs5756489	22:37417197	MCH
294	rs4821585	22:37419220	MCH
295	rs5756490	22:37421603	MCH
296	rs68159414	22:37421604	MCH
297	rs5756491	22:37421702	MCH
298	rs3753144	22:37423485	MCH
299	rs8141597	22:37424848	MCH
300	rs5750373	22:37425031	MCH
301	rs228129	22:37428599	MCH, MCV
302	rs135167	22:37429129	MCH, MCV
303	rs130610	22:37431871	MCH, MCV
304	rs228131	22:37432243	MCH, MCV
305	rs9610635	22:37432421	MCH
306	rs130613	22:37432632	MCH, MCV
307	rs25095	22:37434028	MCH, MCV
308	rs9610636	22:37434773	MCH
309	rs130618	22:37435443	MCH, MCV
310	rs7287890	22:37436343	MCH
311	rs130619	22:37436348	MCH,MCV
312	rs130621	22:37437354	MCH,MCV
313	rs9607408	22:37437831	MCH
314	rs130624	22:37438651	MCH, MCV
315	rs5756495	22:37438728	MCH
316	rs7285681	22:37439701	MCH
317	22:37441417:T_TG	22:37441417:T_TG	MCH
318	rs5756497	22:37444960	MCH
319	rs9610638	22:37445668	MCH, MCV
320	rs11913810	22:37447046	MCH
321	22:37454545:AT_A	22:37454545:AT_A	MCH, MCV
322	rs760719	22:37460449	MCH, MCV, MCHC
323	rs2235321	22:37462926	Hb, MCH, MCV
324	rs855791	22:37462936	MCH, MCV
325	rs6000550	22:37463450	MCH
326	rs877908	22:37464624	Hb, MCH, MCV
327	22:37465385:CTGGG	22:37465385:CTGGG	MCH, MCV
328	rs5756504	22:37467270	Hb, MCH, MCV
329	rs5756505	22:37467354	Hb, MCH, MCV
330	rs5756506	22:37467392	Hb, MCH, MCV
331	rs6000553	22:37469192	MCH, MCHC, MCV
332	rs4820268	22:37469591	MCH, MCHC, MCV
333	rs2076085	22:37470041	MCH, MCHC, MCV
334	rs2413450	22:37470224	MCH, MCHC, MCV
335	rs2076086	22:37470536	Hb, MCH, MCV
336	rs2072860	22:37470604	MCH, MCHC, MCV
337	rs9610643	22:37471385	MCH, MCV
338	rs855788	22:37474079	MCH, MCV
339	22:37474892:AGGAG	22:37474892:AGGAG	MCH
340	rs56270606	22:37477582	MCH
341	rs2743820	22:37477970	MCH
342	rs7286184	22:37478775	MCH
343	rs2543521	22:37480155	MCH
344	rs2543520	22:37480181	MCH
345	rs2111833	22:37480797	MCH
346	rs2235325	22:37481637	MCH
347	rs5756507	22:37483481	MCH
348	rs11089821	22:37483691	MCH
349	rs9607412	22:37484337	MCH
350	rs9610646	22:37484374	MCH
351	rs9610647	22:37484944	MCH
352	rs2235323	22:37485193	MCH
353	rs2235324	22:37485724	MCH
354	rs736852	22:37486205	MCH
355	rs2019848	22:37486265	MCH
356	rs738295	22:37486866	MCH
357	rs4328728	22:37487529	MCH
358	rs5756508	22:37487659	MCH
359	rs5756509	22:37487687	MCH
360	rs1421312	22:37487810	MCH
361	rs2743822	22:37488574	MCH
362	rs5756510	22:37488850	MCH
363	rs2543515	22:37488981	MCH
364	rs2543514	22:37489274	MCH
365	rs5750378	22:37489730	MCH
366	rs12172465	22:37489773	MCH
367	rs6000567	22:37489880	MCH
368	rs5750379	22:37490005	MCH
369	rs5750380	22:37490033	MCH
370	rs2543513	22:37490396	MCH
371	rs2413451	22:37490691	MCH
372	rs2251655	22:37490692	MCH
373	rs2543511	22:37491140	MCH
374	rs5756511	22:37491150	MCH
375	rs2743824	22:37491545	MCH
376	rs2543510	22:37491822	MCH
377	rs2543509	22:37491839	MCH
378	rs2743825	22:37492201	MCH
379	rs5756512	22:37492585	MCH
380	rs55747547	22:37493863	MCH
381	rs35771797	22:37494201	MCH
382	rs732755	22:37494318	MCH
383	rs732756	22:37494420	MCH
384	rs8139988	22:37494721	MCH
385	rs228904	22:37494814	MCH
386	rs2017764	22:37494915	MCH
387	rs2281090	22:37495370	MCH
388	rs2281091	22:37495550	MCH
389	rs2281092	22:37495635	MCH
390	rs9610649	22:37496127	MCH
391	rs4560232	22:37496283	MCH
392	rs7289616	22:37496410	MCH
393	rs55945931	22:37496460	MCH
394	rs9619658	22:37496847	MCH

## Sheet: HetPVal<0.05
			Discovery study (NHb=11 093; NMCH=8125)
Marker Name	Position (chr:bp)	Minor Allele	MAF	Effect	StdErr	P	Direction	HetISq	HetChiSq	HetDf	HetPVal	Trait
rs55964643	6:26340872	g	0.4703	-0.1	0.0176	1.404e-08	++++-++	58.6	14.51	6	0.02443	Hb
rs9467714	6:26340785	a	0.1387	-0.1289	0.0226	1.195e-08	-------	65.2	17.234	6	0.008461	Hb
rs11966360	6:26316982	g	0.1464	-0.1206	0.0215	1.973e-08	+++++++	68.9	19.29	6	0.003701	Hb
rs12210098	6:25963966	t	0.341	0.0879	0.016	3.888e-08	++++-++	54.9	13.302	6	0.03848	Hb
rs34164109	6:135421176	t	0.2597	0.2744	0.0327	4.527e-17	+++++	58.7	9.677	4	0.04624	MCH
rs7743042	6:135419834	a	0.4799	-0.2847	0.045	2.539e-10	-----	59.8	9.941	4	0.04143	MCH
rs9402685	6:135419688	c	0.2589	0.2734	0.0326	4.802e-17	-----	59.3	9.831	4	0.04338	MCH
rs9376091	6:135419636	t	0.2589	0.2734	0.0326	4.812e-17	+++++	59.4	9.846	4	0.04311	MCH
rs9389268	6:135419631	g	0.2589	0.2736	0.0326	4.621e-17	-----	59.2	9.811	4	0.04374	MCH
rs9402684	6:135419305	t	0.4817	-0.2851	0.0454	3.3e-10	-----	60	9.99	4	0.0406	MCH
rs35786788	6:135419042	a	0.2589	0.2735	0.0326	4.681e-17	+++++	59.2	9.799	4	0.04396	MCH
rs9399137	6:135419018	c	0.2589	0.2735	0.0326	4.699e-17	-----	59.2	9.795	4	0.04402	MCH
rs7776054	6:135418916	g	0.2589	0.2734	0.0326	4.852e-17	-----	59	9.765	4	0.04458	MCH
6:135418632:TTAC_	6:135418632	d	0.26	0.2728	0.0326	6.363e-17	+++++	59.3	9.823	4	0.04352	MCH
rs9376090	6:135411228	c	0.2561	0.2658	0.0326	3.888e-16	-----	60.6	10.154	4	0.03792	MCH
rs1331309	6:135406178	g	0.2561	0.2661	0.0329	5.723e-16	-----	60.2	10.06	4	0.03943	MCH
rs9399136	6:135402339	c	0.2525	0.2694	0.0334	7.592e-16	-----	60.2	10.044	4	0.0397	MCH
rs2072860	22:37470604	g	0.4594	-0.2859	0.0285	1.215e-23	+++++	65.4	11.545	4	0.02107	MCH
rs2413450	22:37470224	t	0.4561	-0.2849	0.0285	1.352e-23	-----	63.4	10.937	4	0.02728	MCH
rs2076085	22:37470041	c	0.4575	-0.285	0.0284	1.059e-23	+++++	64.5	11.266	4	0.02374	MCH
rs4820268	22:37469591	g	0.4586	-0.2844	0.0283	1.032e-23	+++++	64.9	11.387	4	0.02255	MCH
rs6000553	22:37469192	a	0.4621	-0.2908	0.0288	5.22e-24	-----	64.4	11.231	4	0.02409	MCH
rs760719	22:37460449	t	0.429	-0.3065	0.0303	4.014e-24	-----	59.2	9.808	4	0.04379	MCH
22:37454545:AT_A	22:37454545	d	0.3049	0.3304	0.0429	1.288e-14	+++++	63.2	10.876	4	0.02799	MCH
rs9610638	22:37445668	t	0.4781	-0.3383	0.036	5.702e-21	-----	66.5	11.937	4	0.01783	MCH
rs5756497	22:37444960	a	0.3186	0.2948	0.0439	1.808e-11	+++++	61.3	10.346	4	0.03499	MCH
22:37441417:T_TG	22:37441417	i	0.3143	0.3088	0.0451	7.886e-12	+++++	65	11.425	4	0.02218	MCH
rs7285681	22:37439701	c	0.318	0.2934	0.0442	3.123e-11	+++++	61.8	10.461	4	0.03334	MCH
rs5756495	22:37438728	t	0.3129	0.3027	0.0452	2.11e-11	+++++	60.7	10.184	4	0.03744	MCH
rs9607408	22:37437831	c	0.3125	0.3017	0.0451	2.321e-11	-----	62.4	10.63	4	0.03106	MCH
rs7287890	22:37436343	a	0.3187	0.2965	0.0443	2.092e-11	+++++	62.1	10.558	4	0.03201	MCH
rs9610636	22:37434773	g	0.3187	0.2959	0.0443	2.342e-11	-----	62.8	10.761	4	0.02939	MCH
rs9610635	22:37432421	t	0.3191	0.2962	0.0448	3.848e-11	+++++	63.7	11.015	4	0.0264	MCH
rs5756491	22:37421702	a	0.4882	-0.2595	0.0358	4.118e-13	-----	63.9	11.074	4	0.02574	MCH
rs4821585	22:37419220	t	0.4848	-0.2575	0.0356	4.75e-13	-----	62.3	10.597	4	0.03149	MCH
rs5756489	22:37417197	t	0.4892	-0.2548	0.0355	7.255e-13	-----	63.4	10.936	4	0.02729	MCH
rs5756487	22:37416800	t	0.4964	0.2515	0.0352	9.758e-13	-----	62.3	10.624	4	0.03114	MCH
rs130605	22:37410368	a	0.4726	-0.2258	0.0377	2.084e-09	-----	65.3	11.527	4	0.02123	MCH
