# Supplementary material for: Replication and Characterization of Association between ABO SNPs and Red Blood Cell Traits by Meta-Analysis in Europeans
Source: PLoS One. 2016 Jun 9;11(6):e0156914. doi: 10.1371/journal.pone.0156914 (PMC4900668; doi:10.1371/journal.pone.0156914)
Supplement: S4 Table — Results for 47 SNPs in/around ABO gene, which were either significantly or suggestively associated with Hb, Hct and RCC in seven studies from the UCLEB consortium. The rs numbers of the SNPs which were significantly associated with Hb, Hct and/or RCC (P < 5×10−8, N = 15) in the discovery study are highlighted in bold and the corresponding fields are marked in blue; these are additionally shown in Table 3. The significant replication results (P < 0.05) are marked in red (separate file). (XLSX) [file pone.0156914.s013.xlsx]

## Sheet: Significant and suggestive ABO
			Discovery study (NHb=11 093; NHct=8128; NRCC=8129)								Replication study (N=2848)					Table legend:
Marker Name	Position (chr:bp)	Minor Allele*	MAF	Effect	StdErr	P	Direction	HetISq	HetPVal	Trait	MAF	Effect	StdErr	P		Marker Name	SNP ID number
rs687621	9:136137065	g	0.3265	-0.272	0.0551	7.963e-07	-----	0	0.7198	Hct	0.3695	-0.1807	0.077761	0.02015		Position	SNP position given as chromosome:base pair on hg19
rs687289	9:136137106	a	0.3262	-0.2736	0.0552	7.048e-07	-----	0	0.7066	Hct	0.3669	-0.181	0.078246	0.0207		Minor Allele*	SNP's minor (effect) allele
rs8176685	9:136138765	d	0.1448	-0.1328	0.0232	1.083e-08	---+---	45.7	0.08654	Hb	0.1373	-0.10002	0.0542967	0.06547		MAF	Minor (effect) allele frequency
		d	0.1439	-0.5406	0.0802	1.585e-11	-----	0	0.5072	Hct	0.1373	-0.3278	0.150234	0.02909		Effect	Estimate of the effect size
		d	0.1439	-0.0533	0.0095	1.981e-08	-----	18.7	0.2956	RCC	0.1373	-0.0307	0.019725	0.1193		StdErr	Standard error for the effect size
rs149092047	9:136139907	d	0.2588	-0.1008	0.0173	5.292e-09	-------	0	0.9432	Hb	0.2591	-0.07819	0.0364577	0.03198		P.value	P value for the association between the SNP and the outcome
		d	0.2578	-0.3519	0.0588	2.216e-09	-----	0	0.9957	Hct	0.2591	-0.248	0.100874	0.01396		Direction	Direction of effect in multiple studies
		d	0.2578	-0.0338	0.007	1.248e-06	-----	0	0.7908	RCC	0.2591	-0.0249	0.013245	0.06052		HetISq	Measure of heterogeneity, I2
rs2519093	9:136141870	t	0.1891	-0.1217	0.0193	2.667e-10	-------	0	0.5868	Hb	0.2152	-0.07538	0.0405992	0.06335		HetPVal	Heterogeneity P value
		t	0.1902	-0.4398	0.0655	1.829e-11	-----	0	0.7131	Hct	0.2152	-0.2561	0.112327	0.02261		Trait	Red blood cell trait tested
		t	0.1901	-0.0413	0.0078	1.008e-07	-----	25.6	0.2509	RCC	0.2152	-0.0225	0.014749	0.1275		* Structural variation alleles: d=deletion,i=insertion, r=reference
rs514659	9:136142203	c	0.3269	-0.2687	0.0551	1.093e-06	-----	0	0.6775	Hct	0.3678	-0.1789	0.077602	0.02118
rs543040	9:136143000	t	0.3282	-0.2686	0.0551	1.069e-06	-----	0	0.6652	Hct	0.3591	-0.1852	0.080242	0.02098
rs545971	9:136143372	t	0.3269	-0.2688	0.0551	1.087e-06	-----	0	0.6769	Hct	0.368	-0.1804	0.07784	0.0205
rs612169	9:136143442	g	0.3269	-0.2688	0.0551	1.087e-06	-----	0	0.6769	Hct	0.3678	-0.18	0.077857	0.02079
rs597988	9:136144284	a	0.3155	-0.2785	0.0567	9.155e-07	-----	0	0.6123	Hct	0.3227	-0.2063	0.088247	0.01941
rs597974	9:136144297	g	0.313	-0.2679	0.0571	2.676e-06	-----	0	0.5191	Hct	0.32	-0.2062	0.088957	0.02044
rs576123	9:136144308	c	0.3129	-0.2683	0.0571	2.581e-06	-----	0	0.5184	Hct	0.3174	-0.2094	0.089702	0.01956
rs576125	9:136144309	a	0.3129	-0.2682	0.0571	2.608e-06	-----	0	0.5187	Hct	0.3185	-0.2073	0.089392	0.02042
rs8176663	9:136144427	c	0.3269	-0.2687	0.0551	1.095e-06	-----	0	0.6776	Hct	0.3675	-0.1809	0.077979	0.02037
rs491626	9:136144873	t	0.3269	-0.2687	0.0551	1.092e-06	-----	0	0.6777	Hct	0.3646	-0.1842	0.078816	0.01946
rs492488	9:136144960	a	0.3269	-0.2687	0.0551	1.092e-06	-----	0	0.6777	Hct	0.3678	-0.1824	0.078112	0.01953
rs493246	9:136144994	a	0.3269	-0.2687	0.0551	1.092e-06	-----	0	0.6777	Hct	0.3689	-0.1829	0.078279	0.01944
rs495203	9:136145240	t	0.3269	-0.2694	0.0551	1.03e-06	-----	0	0.6775	Hct	0.3682	-0.1824	0.078175	0.01966
rs28850884	9:136145424	d	0.2507	-0.1035	0.0178	6.263e-09	-------	0	0.9233	Hb	0.2258	-0.09633	0.0418349	0.02129
		d	0.248	-0.3576	0.061	4.523e-09	-----	0	0.9833	Hct	0.2258	-0.2965	0.115756	0.01041
		d	0.2479	-0.0342	0.0072	2.149e-06	-----	0	0.7736	RCC	0.2258	-0.0324	0.015197	0.03298
rs9411378	9:136145425	a	0.2513	-0.1033	0.0178	6.467e-09	-------	0	0.9228	Hb	0.227	-0.09617	0.0417323	0.0212
		a	0.2485	-0.3576	0.0609	4.224e-09	-----	0	0.9838	Hct	0.227	-0.2952	0.115473	0.01058
		a	0.2484	-0.0343	0.0072	1.951e-06	-----	0	0.7832	RCC	0.227	-0.032	0.01516	0.03481
rs582118	9:136145471	g	0.3268	-0.2693	0.0551	1.039e-06	-----	0	0.6786	Hct	0.3678	-0.1823	0.078179	0.01973
rs582094	9:136145484	t	0.3268	-0.2693	0.0551	1.039e-06	-----	0	0.6786	Hct	0.3678	-0.1826	0.078187	0.01955
rs34357864	9:136145907	i	0.3269	-0.2686	0.0552	1.116e-06	-----	0	0.6859	Hct	0.3669	-0.1814	0.078333	0.02059
rs2769071	9:136145974	g	0.3273	-0.2689	0.0551	1.061e-06	-----	0	0.6834	Hct	0.3675	-0.1833	0.078477	0.01953
rs200738971	9:136146061	i	0.3176	-0.2634	0.0561	2.714e-06	-----	0	0.6746	Hct	0.3592	-0.1883	0.080849	0.01987
rs189262702	9:136146068	i	0.3191	-0.2598	0.056	3.496e-06	-----	0	0.6706	Hct	0.3611	-0.1862	0.079822	0.01964
rs676996	9:136146077	g	0.3191	-0.2598	0.056	3.496e-06	-----	0	0.6706	Hct	0.3602	-0.1873	0.08005	0.01927
rs676457	9:136146227	t	0.3269	-0.2681	0.0551	1.16e-06	-----	0	0.6898	Hct	0.3675	-0.1813	0.07845	0.02084
rs527210	9:136146431	t	0.3158	-0.2648	0.0562	2.423e-06	-----	0	0.8582	Hct	0.3568	-0.1871	0.080691	0.02042
rs139840563	9:136146448	d	0.3133	-0.2651	0.0564	2.572e-06	-----	0	0.8844	Hct	0.3539	-0.1873	0.081385	0.02139
rs550057	9:136146597	t	0.2619	-0.0982	0.0172	1.121e-08	-------	0	0.9477	Hb	0.2633	-0.07925	0.0360564	0.02795
		t	0.2608	-0.3454	0.0585	3.568e-09	-----	0	0.9811	Hct	0.2633	-0.249	0.099765	0.01257
		t	0.2608	-0.0334	0.0069	1.387e-06	-----	0	0.7589	RCC	0.2633	-0.0251	0.013099	0.05536
rs674302	9:136146664	a	0.3269	-0.2681	0.0551	1.16e-06	-----	0	0.6898	Hct	0.3677	-0.183	0.078466	0.01967
rs554833	9:136147160	t	0.3269	-0.2681	0.0551	1.16e-06	-----	0	0.6898	Hct	0.3675	-0.1824	0.07852	0.02016
rs505922	9:136149229	c	0.3253	-0.2643	0.0552	1.681e-06	-----	0	0.7624	Hct	0.3575	-0.1915	0.080897	0.01791
rs507666	9:136149399	a	0.189	-0.1228	0.0193	1.842e-10	-------	0	0.6254	Hb	0.2166	-0.07164	0.0398921	0.07251
		a	0.1902	-0.4441	0.0655	1.188e-11	-----	0	0.7774	Hct	0.2166	-0.2465	0.11037	0.02554
		a	0.1901	-0.0421	0.0078	5.694e-08	-----	15.5	0.3156	RCC	0.2166	-0.0213	0.014492	0.1413
rs529565	9:136149500	c	0.3253	-0.2649	0.0552	1.601e-06	-----	0	0.7675	Hct	0.3583	-0.1929	0.080884	0.01706
rs8176643	9:136149709	d	0.1776	-0.1253	0.0199	3.368e-10	-------	0	0.717	Hb	0.1765	-0.08023	0.044165	0.0693
		d	0.1794	-0.4607	0.0676	9.635e-12	-----	0	0.85	Hct	0.1765	-0.2682	0.122198	0.02818
		d	0.1795	-0.0436	0.008	4.975e-08	-----	0	0.4676	RCC	0.1765	-0.0255	0.016044	0.1118
rs532436	9:136149830	a	0.1892	-0.1219	0.0193	2.443e-10	-------	0	0.5966	Hb	0.2166	-0.07167	0.0398954	0.07242
		a	0.1904	-0.4418	0.0654	1.466e-11	-----	0	0.7584	Hct	0.2166	-0.2464	0.11038	0.02557
		a	0.1903	-0.0421	0.0077	5.411e-08	-----	15.8	0.314	RCC	0.2166	-0.0214	0.014493	0.1407
rs600038	9:136151806	c	0.2129	-0.1021	0.0185	3.467e-08	-------	0	0.6909	Hb	0.2405	-0.03197	0.0381288	0.4018
		c	0.2146	-0.3797	0.0628	1.457e-09	-----	0	0.7618	Hct	0.2405	-0.1355	0.105507	0.1992
		c	0.2146	-0.0343	0.0074	3.996e-06	-----	0	0.6162	RCC	0.2405	-0.0081	0.01385	0.5587
rs651007	9:136153875	t	0.2123	-0.1046	0.0185	1.623e-08	-------	0	0.6899	Hb	0.2414	-0.03292	0.0379794	0.3861
		t	0.2142	-0.3821	0.0628	1.153e-09	-----	0	0.7517	Hct	0.2414	-0.1393	0.105092	0.185
		t	0.2142	-0.0348	0.0074	2.93e-06	-----	0	0.5842	RCC	0.2414	-0.0086	0.013796	0.5312
rs11244061	9:136153981	t	0.1164	-0.1087	0.0236	4.018e-06	-------	0	0.4685	Hb	0.0956	-0.07634	0.0630948	0.2263
rs579459	9:136154168	c	0.2123	-0.1045	0.0185	1.631e-08	-------	0	0.6901	Hb	0.2402	-0.03261	0.0381642	0.3929
		c	0.2142	-0.382	0.0628	1.16e-09	-----	0	0.7517	Hct	0.2402	-0.1376	0.105604	0.1925
		c	0.2141	-0.0348	0.0074	2.862e-06	-----	0	0.5856	RCC	0.2402	-0.0084	0.013863	0.5469
rs649129	9:136154304	t	0.2123	-0.1053	0.0185	1.291e-08	-------	0	0.6921	Hb	0.2402	-0.03243	0.0381637	0.3955
		t	0.2142	-0.3822	0.0628	1.14e-09	-----	0	0.747	Hct	0.2402	-0.1372	0.105603	0.1939
		t	0.2142	-0.0348	0.0074	2.884e-06	-----	0	0.586	RCC	0.2402	-0.0083	0.013863	0.5477
rs495828	9:136154867	t	0.2123	-0.1051	0.0185	1.368e-08	-------	0	0.6845	Hb	0.2402	-0.03236	0.0381799	0.3966
		t	0.2141	-0.3821	0.0628	1.172e-09	-----	0	0.737	Hct	0.2402	-0.1372	0.105648	0.194
		t	0.2141	-0.0346	0.0074	3.173e-06	-----	0	0.5832	RCC	0.2402	-0.0084	0.013868	0.5428
rs635634	9:136155000	t	0.1894	-0.1205	0.0193	3.857e-10	-------	0	0.575	Hb	0.2164	-0.07216	0.0399371	0.0708
		t	0.1906	-0.4393	0.0654	1.898e-11	-----	0	0.7546	Hct	0.2164	-0.2498	0.110493	0.02375
		t	0.1905	-0.0421	0.0077	5.634e-08	-----	15.6	0.3152	RCC	0.2164	-0.0218	0.014508	0.1335
rs558240	9:136157133	a	0.3982	-0.0715	0.0154	3.34e-06	-------	0	0.6665	Hb	0.3842	-0.02968	0.0361652	0.4119
		a	0.3986	-0.256	0.0525	1.052e-06	-----	0	0.8636	Hct	0.3842	-0.0301	0.1001	0.7635
rs11244084	9:136191010	t	0.0733	-0.1331	0.0291	4.717e-06	--+----	29.9	0.1997	Hb	0.0642	-0.0505	0.0851437	0.5531
