# Supplementary material for: Replication and Characterization of Association between ABO SNPs and Red Blood Cell Traits by Meta-Analysis in Europeans
Source: PLoS One. 2016 Jun 9;11(6):e0156914. doi: 10.1371/journal.pone.0156914 (PMC4900668; doi:10.1371/journal.pone.0156914)
Supplement: S6 Table — (XLSX) [file pone.0156914.s015.xlsx]

## Sheet: Correlation coeficients
Pearson's r	Hb	Hct	MCH	MCHC	MCV	RCC	FVIII	logVWF	LDL	TC	logALP
Hb	1
Hct	0.89091	1
MCH	0.369728	0.167869	1
MCHC	0.24064	-0.259106	0.419449	1
MCV	0.190942	0.278339	0.776461	-0.291764	1
RCC	0.762	0.806811	-0.326067	-0.057966	-0.331795	1
FVIII	-0.318231	-0.262651	-0.200422	-0.0734583	-0.106106	-0.185628	1
logVWF	-0.151464	-0.116723	-0.0881003	-0.0323634	-0.0266578	-0.0924843	0.688135	1
LDL	0.0358775	0.0682985	-0.0618735	-0.0923351	-0.00312433	0.0635523	0.111486	0.0169903	1
TC	0.00385746	0.110636	-0.0737642	-0.081606	0.0488458	0.077434	0.205638	0.0895693	0.806824	1
logALP	-0.00644827	0.00969795	-0.0412197	NA	-0.0583084	0.0414463	0.0363912	0.02677	0.0191717	0.0652382	1
Color code:
	r = 1
	r = 0
	r = -1
Trait abbreviations
	Hb = Hemoglobin
	Hct = Hematocrit
	MCH = mean corpuscular hemoglobin
	MCHC = Mean corpuscular hemoglobin concentration
	MCV = Mean corpuscular volume
	RCC = Red blood cell count
	FVIII = Factor VIII
	logVWF = Log transformed von Willebrand factor
	LDL = Low-density lipoprotein cholesterol
	TC = total cholesterol
	logALP = Log transformed alkaline phosphatase
